# Supplementary material for: Outcomes of Genetic Testing-Based Cardiac Rehabilitation Program in Patients with Acute Myocardial Infarction after Percutaneous Coronary Intervention
Source: Cardiol Res Pract. 2022 Aug 17;2022:9742071. doi: 10.1155/2022/9742071 (PMC9402363; doi:10.1155/2022/9742071)
Supplement: Supplementary Materials — Table S1. A total of 111 exercise-related single nucleotide polymorphisms (SNP) and 76 exercise-related genes were obtained after analysis by a text mining program. [file 9742071.f1.xlsx]

## Sheet: msokok.rs2
setence_id	pubmed_id	start	end	species	gid	score	mention	sentence	gid	symbol	gene_name	alias	alias_name	text_title	text_abstract	journal	year	rs_ID	symbol	rs_ID	symbol	rs_ID	ID	type
16391565_ABSTRACT_7	16391565	38	41	9606	1636	1	ACE	Other polymorphisms that define major ACE haplotypes in European populations (rs4424958, rs4311) show weaker associations with these performance-related phenotypes than does I/D.	1636	ACE	angiotensin I converting enzyme (peptidyl-dipeptidase A) 1	ACE1|CD143|DCP|DCP1|MGC26566	CD143 antigen|angiotensin I converting enzyme|angiotensin converting enzyme, somatic isoform|carboxycathepsin|dipeptidyl carboxypeptidase 1|kininase II|peptidase P|peptidyl-dipeptidase A|testicular ECA	The associations of ACE polymorphisms with physical, physiological and skill parameters in adolescents.	Genetic variation in the human Angiotensin I-Converting Enzyme (ACE) gene has been associated with many heritable traits, including physical performance. Herein we report the results of a study of several physical, physiological and skill parameters and lifestyle in 1,027 teenage Greeks. We show that there is a strong association (P < 0.001) between the ACE I/D (insertion/deletion) polymorphism a…	Eur. J. Hum. Genet.	2006	rs4311	ACE	rs4311	ACE	rs4311	---	strength training
16391565_ABSTRACT_7	16391565	38	41	9606	1636	1	ACE	Other polymorphisms that define major ACE haplotypes in European populations (rs4424958, rs4311) show weaker associations with these performance-related phenotypes than does I/D.	1636	ACE	angiotensin I converting enzyme (peptidyl-dipeptidase A) 1	ACE1|CD143|DCP|DCP1|MGC26566	CD143 antigen|angiotensin I converting enzyme|angiotensin converting enzyme, somatic isoform|carboxycathepsin|dipeptidyl carboxypeptidase 1|kininase II|peptidase P|peptidyl-dipeptidase A|testicular ECA	The associations of ACE polymorphisms with physical, physiological and skill parameters in adolescents.	Genetic variation in the human Angiotensin I-Converting Enzyme (ACE) gene has been associated with many heritable traits, including physical performance. Herein we report the results of a study of several physical, physiological and skill parameters and lifestyle in 1,027 teenage Greeks. We show that there is a strong association (P < 0.001) between the ACE I/D (insertion/deletion) polymorphism a…	Eur. J. Hum. Genet.	2006	rs4424958	ACE	rs4424958	ACE	rs4424958	---	strength training
17327385_ABSTRACT_6	17327385	71	76	9606	5467	1	PPARD	After 9 months of intervention, the minor G allele of SNP rs2267668 in PPARD and the minor serine-encoding allele of the common Gly482Ser SNP in PPARGC1A were independently associated with less increase in individual anaerobic threshold (n = 136, P = 0.002 and P = 0.005), a precise measurement of aerobic physical fitness.	5467	PPARD	peroxisome proliferator-activated receptor delta	FAAR|MGC3931|NR1C2|NUC1|NUCI|NUCII|PPAR-beta|PPARB	OTTHUMP00000016256|nuclear hormone receptor 1|peroxisome proliferative activated receptor, delta	Genetic variations in PPARD and PPARGC1A determine mitochondrial function and change in aerobic physical fitness and insulin sensitivity during lifestyle intervention.	Mitochondrial function is associated with aerobic physical fitness and insulin sensitivity and may play an important role in the pathophysiology of type 2 diabetes. Peroxisome proliferator-activated receptor (PPAR)-delta (gene PPARD) and PPARgamma coactivator 1alpha (gene PPARGC1A) are determinants of mitochondrial function in animals and in vitro. The objective of this study was to establish whe…	J. Clin. Endocrinol. Metab.	2007	rs2267668	PPARD	rs2267668	PPARD	rs2267668	---	aerobic exercise
17327385_ABSTRACT_6	17327385	145	153	9606	10891	0.9407	PPARGC1A	After 9 months of intervention, the minor G allele of SNP rs2267668 in PPARD and the minor serine-encoding allele of the common Gly482Ser SNP in PPARGC1A were independently associated with less increase in individual anaerobic threshold (n = 136, P = 0.002 and P = 0.005), a precise measurement of aerobic physical fitness.	10891	PPARGC1A	peroxisome proliferator-activated receptor gamma, coactivator 1 alpha	LEM6|PGC-1(alpha)|PGC-1v|PGC1|PGC1A|PPARGC1	OTTHUMP00000123372|PPAR gamma coactivator variant form|PPAR gamma coactivator-1|ligand effect modulator-6|peroxisome proliferative activated receptor, gamma, coactivator 1, alpha	Genetic variations in PPARD and PPARGC1A determine mitochondrial function and change in aerobic physical fitness and insulin sensitivity during lifestyle intervention.	Mitochondrial function is associated with aerobic physical fitness and insulin sensitivity and may play an important role in the pathophysiology of type 2 diabetes. Peroxisome proliferator-activated receptor (PPAR)-delta (gene PPARD) and PPARgamma coactivator 1alpha (gene PPARGC1A) are determinants of mitochondrial function in animals and in vitro. The objective of this study was to establish whe…	J. Clin. Endocrinol. Metab.	2007	rs8192678	PPARGC1A	rs8192678	PPARGC1A	rs8192678	rs8192678	aerobic exercise
19155013_ABSTRACT_3	19155013	29	33	9606	4846	1	eNOS	We examined the influence of eNOS -786 T>C (rs2070744) on the BP and NO response to acute dynamic exercise.	4846	NOS3	nitric oxide synthase 3 (endothelial cell)	ECNOS|eNOS	endothelial nitric oxidase synthase|endothelial nitric oxide synthase	The endothelial nitric oxide synthase -786 T>C polymorphism and the exercise-induced blood pressure and nitric oxide responses among men with elevated blood pressure.	A polymorphism (-786 T>C) in the promoter region of the endothelial nitric oxide synthase gene (eNOS) has important functional characteristics. We examined the influence of eNOS -786 T>C (rs2070744) on the BP and NO response to acute dynamic exercise. Subjects (n=49, 43.7+/-1.4 yr) had pre- to Stage-1 hypertension (145.6+/-1.5/85.9+/-1.1 mmHg). Volunteers performed three experiments; a non-exerci…	Atherosclerosis	2009	rs2070744	NOS3	rs2070744	NOS3	rs2070744	---	vascular smooth muscle contraction
19544227_ABSTRACT_2	19544227	34	49	9606	89	1	alpha-actinin-3	A common genetic variation in the alpha-actinin-3 ( ACTN3) gene causes a replacement of an arginine (R) with a premature stop codon (X) at amino-acid 577 (rs1815739).	89	ACTN3	actinin, alpha 3	MGC117002|MGC117005	-	ACTN3 R577X polymorphism and Israeli top-level athletes.	A common genetic variation in the alpha-actinin-3 ( ACTN3) gene causes a replacement of an arginine (R) with a premature stop codon (X) at amino-acid 577 (rs1815739). While the R allele has been found to be associated with power-oriented performance, the XX genotype may be linked with endurance ability. To test this hypothesis, we studied the distribution of ACTN3 genotypes in 155 Israeli athlete…	Int J Sports Med	2009	rs1815739	ACTN3	rs1815739	ACTN3	rs1815739	rs1815739	strength training
19553224_ABSTRACT_2	19553224	83	88	9606	154	0.9407	ADRB2	In this study, allele and genotype frequencies of the ADRB1 Arg389Gly (rs1801253), ADRB2 Gly16Arg (rs1042713) and Gln27Glu (rs1042714), and ADRB3 Trp64Arg (rs4994) variations were compared in the following three groups of Spanish (Caucasian) men: (1) world-class endurance athletes (E; runners and cyclists, n=100), (2) elite power athletes (P; sprinters, jumpers and throwers, n=53) and (3) non-ath…	154	ADRB2	adrenergic, beta-2-, receptor, surface	ADRB2R|ADRBR|B2AR|BAR|BETA2AR	beta-2 adrenergic receptor|beta-2 adrenoceptor|catecholamine receptor	Trp64Arg polymorphism in ADRB3 gene is associated with elite endurance performance.	In this study, allele and genotype frequencies of the ADRB1 Arg389Gly (rs1801253), ADRB2 Gly16Arg (rs1042713) and Gln27Glu (rs1042714), and ADRB3 Trp64Arg (rs4994) variations were compared in the following three groups of Spanish (Caucasian) men: (1) world-class endurance athletes (E; runners and cyclists, n=100), (2) elite power athletes (P; sprinters, jumpers and throwers, n=53) and (3) non-ath…	Br J Sports Med	2011	rs1042713	ADRB2	rs1042713	ADRB2	rs1042713	rs1042713	vascular smooth muscle contraction#aerobic exercise
19553224_ABSTRACT_2	19553224	54	59	9606	153	0.9407	ADRB1	In this study, allele and genotype frequencies of the ADRB1 Arg389Gly (rs1801253), ADRB2 Gly16Arg (rs1042713) and Gln27Glu (rs1042714), and ADRB3 Trp64Arg (rs4994) variations were compared in the following three groups of Spanish (Caucasian) men: (1) world-class endurance athletes (E; runners and cyclists, n=100), (2) elite power athletes (P; sprinters, jumpers and throwers, n=53) and (3) non-ath…	153	ADRB1	adrenergic, beta-1-, receptor	ADRB1R|B1AR|BETA1AR|RHR	OTTHUMP00000020519|beta-1-adrenergic receptor	Trp64Arg polymorphism in ADRB3 gene is associated with elite endurance performance.	In this study, allele and genotype frequencies of the ADRB1 Arg389Gly (rs1801253), ADRB2 Gly16Arg (rs1042713) and Gln27Glu (rs1042714), and ADRB3 Trp64Arg (rs4994) variations were compared in the following three groups of Spanish (Caucasian) men: (1) world-class endurance athletes (E; runners and cyclists, n=100), (2) elite power athletes (P; sprinters, jumpers and throwers, n=53) and (3) non-ath…	Br J Sports Med	2011	rs1801253	ADRB1	rs1801253	ADRB1	rs1801253	---	aerobic exercise
19553224_ABSTRACT_2	19553224	140	145	9606	155	0.9407	ADRB3	In this study, allele and genotype frequencies of the ADRB1 Arg389Gly (rs1801253), ADRB2 Gly16Arg (rs1042713) and Gln27Glu (rs1042714), and ADRB3 Trp64Arg (rs4994) variations were compared in the following three groups of Spanish (Caucasian) men: (1) world-class endurance athletes (E; runners and cyclists, n=100), (2) elite power athletes (P; sprinters, jumpers and throwers, n=53) and (3) non-ath…	155	ADRB3	adrenergic, beta-3-, receptor	BETA3AR	Beta-3 Adrenergic Receptor	Trp64Arg polymorphism in ADRB3 gene is associated with elite endurance performance.	In this study, allele and genotype frequencies of the ADRB1 Arg389Gly (rs1801253), ADRB2 Gly16Arg (rs1042713) and Gln27Glu (rs1042714), and ADRB3 Trp64Arg (rs4994) variations were compared in the following three groups of Spanish (Caucasian) men: (1) world-class endurance athletes (E; runners and cyclists, n=100), (2) elite power athletes (P; sprinters, jumpers and throwers, n=53) and (3) non-ath…	Br J Sports Med	2011	rs4994	ADRB3	rs4994	ADRB3	rs4994	rs4994	aerobic exercise#anaerobic exercise
19653005_ABSTRACT_8	19653005	156	160	9606	7352	0.9407	UCP3	Ten 'endurance alleles' (NFATC4 Gly160, PPARA rs4253778 G, PPARD rs2016520 C, PPARGC1A Gly482, PPARGC1B 203Pro, PPP3R1 promoter 5I, TFAM 12Thr, UCP2 55Val, UCP3 rs1800849 T and VEGFA rs2010963 C) were first identified showing discrete associations with elite endurance athlete status.	7352	UCP3	uncoupling protein 3 (mitochondrial, proton carrier)	SLC25A9	Uncoupling protein-3|uncoupling protein 3	The combined impact of metabolic gene polymorphisms on elite endurance athlete status and related phenotypes.	Endurance performance is a complex phenotype subject to the influence of both environmental and genetic factors. Although the last decade has seen a variety of specific genetic factors proposed, many in metabolic pathways, each is likely to make a limited contribution to an 'elite' phenotype: it seems more likely that such status depends on the simultaneous presence of multiple such variants. The…	Hum. Genet.	2009	rs1800849	UCP3	rs1800849	UCP3	rs1800849	---	aerobic exercise
19653005_ABSTRACT_8	19653005	156	160	9606	7352	0.9407	VEGFA	Ten 'endurance alleles' (NFATC4 Gly160, PPARA rs4253778 G, PPARD rs2016520 C, PPARGC1A Gly482, PPARGC1B 203Pro, PPP3R1 promoter 5I, TFAM 12Thr, UCP2 55Val, UCP3 rs1800849 T and VEGFA rs2010963 C) were first identified showing discrete associations with elite endurance athlete status.	7422	VEGFA	vascular endothelial growth factor A	MGC70609|VEGF|VEGF-A|VPF	vascular endothelial growth factor isoform VEGF165|vascular permeability factor	The combined impact of metabolic gene polymorphisms on elite endurance athlete status and related phenotypes.	Endurance performance is a complex phenotype subject to the influence of both environmental and genetic factors. Although the last decade has seen a variety of specific genetic factors proposed, many in metabolic pathways, each is likely to make a limited contribution to an 'elite' phenotype: it seems more likely that such status depends on the simultaneous presence of multiple such variants. The…	Hum. Genet.	2009	rs2010963	VEGFA	rs2010963	VEGFA	rs2010963	rs2010963	aerobic exercise
19653005_ABSTRACT_8	19653005	40	45	9606	5465	1	PPARD	Ten 'endurance alleles' (NFATC4 Gly160, PPARA rs4253778 G, PPARD rs2016520 C, PPARGC1A Gly482, PPARGC1B 203Pro, PPP3R1 promoter 5I, TFAM 12Thr, UCP2 55Val, UCP3 rs1800849 T and VEGFA rs2010963 C) were first identified showing discrete associations with elite endurance athlete status.	5467	PPARD	peroxisome proliferator-activated receptor delta	FAAR|MGC3931|NR1C2|NUC1|NUCI|NUCII|PPAR-beta|PPARB	OTTHUMP00000016256|nuclear hormone receptor 1|peroxisome proliferative activated receptor, delta	The combined impact of metabolic gene polymorphisms on elite endurance athlete status and related phenotypes.	Endurance performance is a complex phenotype subject to the influence of both environmental and genetic factors. Although the last decade has seen a variety of specific genetic factors proposed, many in metabolic pathways, each is likely to make a limited contribution to an 'elite' phenotype: it seems more likely that such status depends on the simultaneous presence of multiple such variants. The…	Hum. Genet.	2009	rs2016520	PPARD	rs2016520	PPARD	rs2016520	---	aerobic exercise
20005538_ABSTRACT_3	20005538	75	80	9606	3091	1	HIF1A	The aims of this study were (1) to determine the frequency distribution of HIF1A Pro582Ser (rs11549465) polymorphism among 155 Israeli athletes (sprinters and endurance athletes) and 240 healthy controls and (2) to analyze the influence of the interaction between HIF1A Pro582Ser and ACTN3 R577X (rs1815739) genotypes on sprint performance.	3091	HIF1A	hypoxia inducible factor 1, alpha subunit (basic helix-loop-helix transcription factor)	HIF-1alpha|HIF1|HIF1-ALPHA|MOP1|PASD8|bHLHe78	ARNT interacting protein|hypoxia-inducible factor 1, alpha subunit|hypoxia-inducible factor 1, alpha subunit (basic helix-loop-helix transcription factor)|member of PAS superfamily 1	Is the interaction between HIF1A P582S and ACTN3 R577X determinant for power/sprint performance?	Hypoxia-inducible factor 1 (HIF-1) is a transcription factor that regulates gene expression in response to hypoxia and has been associated with athletic performance. The aims of this study were (1) to determine the frequency distribution of HIF1A Pro582Ser (rs11549465) polymorphism among 155 Israeli athletes (sprinters and endurance athletes) and 240 healthy controls and (2) to analyze the influe…	Metab. Clin. Exp.	2010	rs11549465	HIF1A	rs11549465	HIF1A	rs11549465	rs11549465	strength training#anaerobic exercise#inflammation
20028934_ABSTRACT_3	20028934	49	57	9606	2551	1	NRF2	The aims of the present study were 1) to compare NRF2 A/C (rs12594956) and NRF2 C/T (rs8031031) genotype and allele frequencies between athletes of sports with different demands (endurance vs. sprinters) as well as between competitive levels (elite level vs. national level) and 2) to analyze the interaction of these two polymorphisms and its influence on the level of endurance performance.	2551	GABPA	GA binding protein transcription factor, alpha subunit 60kDa	E4TF1-60|E4TF1A|NFT2|NRF2|NRF2A	GA binding protein transcription factor, alpha subunit|OTTHUMP00000096114|human nuclear respiratory factor-2 subunit alpha|nuclear respiratory factor 2 alpha subunit	Interaction between SNPs in the NRF2 gene and elite endurance performance.	Nuclear respiratory factor 2 (NRF2), a member of the Cap-N-Collar family of transcription factors, plays an important role in the mitochondrial biogenesis, and variants of NRF2 gene have been associated with endurance performance. The aims of the present study were 1) to compare NRF2 A/C (rs12594956) and NRF2 C/T (rs8031031) genotype and allele frequencies between athletes of sports with differen…	Physiol. Genomics	2010	rs12594956	GABPA	rs12594956	GABPA	rs12594956	---	aerobic exercise
20028934_ABSTRACT_3	20028934	75	79	9606	2551	1	NRF2	The aims of the present study were 1) to compare NRF2 A/C (rs12594956) and NRF2 C/T (rs8031031) genotype and allele frequencies between athletes of sports with different demands (endurance vs. sprinters) as well as between competitive levels (elite level vs. national level) and 2) to analyze the interaction of these two polymorphisms and its influence on the level of endurance performance.	2551	GABPA	GA binding protein transcription factor, alpha subunit 60kDa	E4TF1-60|E4TF1A|NFT2|NRF2|NRF2A	GA binding protein transcription factor, alpha subunit|OTTHUMP00000096114|human nuclear respiratory factor-2 subunit alpha|nuclear respiratory factor 2 alpha subunit	Interaction between SNPs in the NRF2 gene and elite endurance performance.	Nuclear respiratory factor 2 (NRF2), a member of the Cap-N-Collar family of transcription factors, plays an important role in the mitochondrial biogenesis, and variants of NRF2 gene have been associated with endurance performance. The aims of the present study were 1) to compare NRF2 A/C (rs12594956) and NRF2 C/T (rs8031031) genotype and allele frequencies between athletes of sports with differen…	Physiol. Genomics	2010	rs8031031	GABPA	rs8031031	GABPA	rs8031031	---	aerobic exercise
20029521_ABSTRACT_2	20029521	47	62	9606	183	1	angiotensinogen	Whether the Met235Thr (rs699) variation in the angiotensinogen (AGT) gene, encoding a threonine instead of a methionine in codon 235 of the mature protein, is associated with athletic performance remains to be elucidated.	183	AGT	angiotensinogen (serpin peptidase inhibitor, clade A, member 8)	ANHU|FLJ92595|FLJ97926|SERPINA8	OTTHUMP00000035878|alpha-1 antiproteinase, antitrypsin|angiotensin I|angiotensin II|angiotensinogen|pre-angiotensinogen|serine (or cysteine) proteinase inhibitor	The C allele of the AGT Met235Thr polymorphism is associated with power sports performance.	Whether the Met235Thr (rs699) variation in the angiotensinogen (AGT) gene, encoding a threonine instead of a methionine in codon 235 of the mature protein, is associated with athletic performance remains to be elucidated. We compared the genotype and allele frequencies for the AGT Met235Thr variation (rs699) in 119 nonathletic controls, 100 world-class endurance athletes (professional cyclists, O…	Appl Physiol Nutr Metab	2009	rs699	AGT	rs699	AGT	rs699	rs699	vascular smooth muscle contraction#strength training
20044476_ABSTRACT_7	20044476	109	115	9606	624	0.9407	BDKRB2	Hardy-Weinberg equilibrium testing on the overall cohort of male athletes showed a significant deviation for BDKRB2 rs1799722 (P = 0.018; P = 0.006 when limited to 316 habitual male runners) with an excess of the TT genotype.	624	BDKRB2	bradykinin receptor B2	B2R|BK-2|BK2|BKR2|BRB2|DKFZp686O088	-	Associations of polymorphisms of eight muscle- or metabolism-related genes with performance in Mount Olympus marathon runners.	Athletic endurance performance is probably partly under genetic control, but genetic association studies have yielded inconclusive results. The objective of the present study was to evaluate the association of polymorphisms in eight muscle- or metabolism-related genes with endurance performance in participants of the Olympus Marathon running race. We recruited 438 athletes who participated in the…	J. Appl. Physiol.	2010	rs1799722	BDKRB2	rs1799722	BDKRB2	rs1799722	rs1799722	aerobic exercise
20845221_ABSTRACT_5	20845221	133	138	9606	89	1	ACTN3	We examined the prevalence of R577X (rs1815739) and two additional haplotype tagging single nucleotide polymorphisms (htSNPs) of the ACTN3 gene (rs1791690 and rs2275998) in the Genathlete study comprising 316 male elite endurance athletes (VO2max 79.0+3.5 ml 路 kg(-1) 路 min(-1); mean +/- s) from North America, Finland, and Germany and 304 sedentary controls (VO2max 40.1+7.0 ml 路 kg(-1) 路 min(-1) m…	89	ACTN3	actinin, alpha 3	MGC117002|MGC117005	-	ACTN3 R577X and other polymorphisms are not associated with elite endurance athlete status in the Genathlete study.	Homozygosity for a premature stop codon at amino acid position 577 in the alpha-actinin-3 (ACTN3) gene leads to 伪-actinin-3 deficiency. This genotype is observed in approximately 18% of Caucasians. The ACTN3 R577X polymorphism has been previously associated with indicators of physical performance in several, but not all, studies. We examined the prevalence of R577X (rs1815739) and two additional …	J Sports Sci	2010	rs1791690	ACTN3	rs1791690	ACTN3	rs1791690	---	aerobic exercise
20845221_ABSTRACT_5	20845221	133	138	9606	89	1	ACTN3	We examined the prevalence of R577X (rs1815739) and two additional haplotype tagging single nucleotide polymorphisms (htSNPs) of the ACTN3 gene (rs1791690 and rs2275998) in the Genathlete study comprising 316 male elite endurance athletes (VO2max 79.0+3.5 ml 路 kg(-1) 路 min(-1); mean +/- s) from North America, Finland, and Germany and 304 sedentary controls (VO2max 40.1+7.0 ml 路 kg(-1) 路 min(-1) m…	89	ACTN3	actinin, alpha 3	MGC117002|MGC117005	-	ACTN3 R577X and other polymorphisms are not associated with elite endurance athlete status in the Genathlete study.	Homozygosity for a premature stop codon at amino acid position 577 in the alpha-actinin-3 (ACTN3) gene leads to 伪-actinin-3 deficiency. This genotype is observed in approximately 18% of Caucasians. The ACTN3 R577X polymorphism has been previously associated with indicators of physical performance in several, but not all, studies. We examined the prevalence of R577X (rs1815739) and two additional …	J Sports Sci	2010	rs2275998	ACTN3	rs2275998	ACTN3	rs2275998	---	aerobic exercise
20952631_ABSTRACT_8	20952631	15	20	9606	3091	0.9407	HIF1A	In whites, the HIF1A rs1957757 and PPARGC1A rs3774909 markers tended to be associated with baseline duration, but the association of a multimarker construct of the most-favorable genotypes at both SNPs with baseline duration was not statistically significant.	3091	HIF1A	hypoxia inducible factor 1, alpha subunit (basic helix-loop-helix transcription factor)	HIF-1alpha|HIF1|HIF1-ALPHA|MOP1|PASD8|bHLHe78	ARNT interacting protein|hypoxia-inducible factor 1, alpha subunit|hypoxia-inducible factor 1, alpha subunit (basic helix-loop-helix transcription factor)|member of PAS superfamily 1	Association of single-nucleotide polymorphisms from 17 candidate genes with baseline symptom-limited exercise test duration and decrease in duration over 20 years: the Coronary Artery Risk Development in Young Adults (CARDIA) fitness study.	It is not known whether the genes involved with endurance performance during young adulthood are also involved with changes in performance. We examined the associations of gene variants with symptom-limited exercise test duration at baseline and decrease in duration over 20 years. A total of 3783 (1835 black, 1948 white) and 2335 (1035 black, 1300 white) participants from the Coronary Artery Risk…	Circ Cardiovasc Genet	2010	rs1957757	HIF1A	rs1957757	HIF1A	rs1957757	---	aerobic exercise
20952631_ABSTRACT_8	20952631	35	43	9606	10891	0.9407	PPARGC1A	In whites, the HIF1A rs1957757 and PPARGC1A rs3774909 markers tended to be associated with baseline duration, but the association of a multimarker construct of the most-favorable genotypes at both SNPs with baseline duration was not statistically significant.	10891	PPARGC1A	peroxisome proliferator-activated receptor gamma, coactivator 1 alpha	LEM6|PGC-1(alpha)|PGC-1v|PGC1|PGC1A|PPARGC1	OTTHUMP00000123372|PPAR gamma coactivator variant form|PPAR gamma coactivator-1|ligand effect modulator-6|peroxisome proliferative activated receptor, gamma, coactivator 1, alpha	Association of single-nucleotide polymorphisms from 17 candidate genes with baseline symptom-limited exercise test duration and decrease in duration over 20 years: the Coronary Artery Risk Development in Young Adults (CARDIA) fitness study.	It is not known whether the genes involved with endurance performance during young adulthood are also involved with changes in performance. We examined the associations of gene variants with symptom-limited exercise test duration at baseline and decrease in duration over 20 years. A total of 3783 (1835 black, 1948 white) and 2335 (1035 black, 1300 white) participants from the Coronary Artery Risk…	Circ Cardiovasc Genet	2010	rs3774909	PPARGC1A	rs3774909	PPARGC1A	rs3774909	---	aerobic exercise
21097644_ABSTRACT_3	21097644	4	8	9606	207	1	AKT1	The AKT1 gene G205T (rs1130214) polymorphism has potential functional effects.	207	AKT1	v-akt murine thymoma viral oncogene homolog 1	AKT|MGC99656|PKB|PKB-ALPHA|PRKBA|RAC|RAC-ALPHA	RAC-alpha serine/threonine-protein kinase|murine thymoma viral (v-akt) oncogene homolog-1|protein kinase B|rac protein kinase alpha	AKT1 G205T genotype influences obesity-related metabolic phenotypes and their responses to aerobic exercise training in older Caucasians.	As part of the insulin signalling pathway, Akt influences growth and metabolism. The AKT1 gene G205T (rs1130214) polymorphism has potential functional effects. Thus, we determined whether the G205T polymorphism influences metabolic variables and their responses to aerobic exercise training. Following dietary stabilization, healthy, sedentary, 50- to 75-year-old Caucasian men (n = 51) and women (n…	Exp. Physiol.	2011	rs1130214	AKT1	rs1130214	AKT1	rs1130214	---	aerobic exercise
21210858_ABSTRACT_5	21210858	81	85	9606	2784	0.9407	GNB3	We also tested the influence of the interaction between the BDKRB2 -9/+9 and the GNB3 C825T (rs5443) genotypes in relation to endurance performance.	2784	GNB3	guanine nucleotide binding protein (G protein), beta polypeptide 3	-	G protein, beta-3 subunit|GTP-binding regulatory protein beta-3 chain|guanine nucleotide-binding protein G(I)/G(S)/G(T) beta subunit 3|guanine nucleotide-binding protein, beta-3 subunit|hypertension associated protein|transducin beta chain 3	Is there an interaction between BDKRB2 -9/+9 and GNB3 C825T polymorphisms and elite athletic performance?	The -9 deletion allele in the BDKRB2 -9/+9 polymorphism was associated previously with improved endurance performance. We compared the frequency distribution of the BDKRB2 -9/+9 (rs5810761) polymorphism between athletes (n=155) of sports with different demands (endurance runners; n=74 vs sprinters; n=81) as well as between athletes of different competitive levels (elite level; n=46 vs national le…	Scand J Med Sci Sports	2011	rs5443	GNB3	rs5443	GNB3	rs5443	---	aerobic exercise
21210858_ABSTRACT_3	21210858	46	58	9606	624	0.9407	BDKRB2 -9/+9	We compared the frequency distribution of the BDKRB2 -9/+9 (rs5810761) polymorphism between athletes (n=155) of sports with different demands (endurance runners; n=74 vs sprinters; n=81) as well as between athletes of different competitive levels (elite level; n=46 vs national level; n=109).	624	BDKRB2	bradykinin receptor B2	B2R|BK-2|BK2|BKR2|BRB2|DKFZp686O088	-	Is there an interaction between BDKRB2 -9/+9 and GNB3 C825T polymorphisms and elite athletic performance?	The -9 deletion allele in the BDKRB2 -9/+9 polymorphism was associated previously with improved endurance performance. We compared the frequency distribution of the BDKRB2 -9/+9 (rs5810761) polymorphism between athletes (n=155) of sports with different demands (endurance runners; n=74 vs sprinters; n=81) as well as between athletes of different competitive levels (elite level; n=46 vs national le…	Scand J Med Sci Sports	2011	rs5810761	BDKRB2	rs5810761	BDKRB2	rs5810761	---	aerobic exercise
21233773_ABSTRACT_4	21233773	157	163	9606	5532	0.9407	PPP3CB	The C allele of the PPP3CA rs3804358 polymorphism was overrepresented in athletes (17%) compared with controls (8%) (P = 0.003), whereas the T allele of the PPP3CB rs3763679 polymorphism was underrepresented in athletes (23%) compared with controls (37%) (P = 0.001).	5532	PPP3CB	protein phosphatase 3 (formerly 2B), catalytic subunit, beta isoform	CALNA2|CALNB	OTTHUMP00000019823|calcineurin A beta|calcineurin A2|protein phosphatase from PCR fragment H32	Are calcineurin genes associated with athletic status? A function, replication study.	Polymorphisms in calcineurin genes are candidates to explain individual variations in endurance sports performance owing to the pivotal role that the calcineurin signaling pathway plays in the regulation of important cardiac and skeletal muscle phenotypes. We compared genotypic/allelic frequencies in 55 single nucleotide polymorphisms (SNP) of the five genes (PPP3CA, PPP3CB, PPP3CC, PPP3R1, and P…	Med Sci Sports Exerc	2011	rs3763679	PPP3CB	rs3763679	PPP3CB	rs3763679	---	aerobic exercise
21233773_ABSTRACT_4	21233773	20	26	9606	5530	1	PPP3CA	The C allele of the PPP3CA rs3804358 polymorphism was overrepresented in athletes (17%) compared with controls (8%) (P = 0.003), whereas the T allele of the PPP3CB rs3763679 polymorphism was underrepresented in athletes (23%) compared with controls (37%) (P = 0.001).	5530	PPP3CA	protein phosphatase 3 (formerly 2B), catalytic subunit, alpha isoform	CALN|CALNA|CALNA1|CCN1|CNA1|PPP2B	calcineurin A alpha|protein phosphatase 3, catalytic subunit, alpha isoform|serine/threonine-protein phosphatase 2B catalytic subunit alpha isoform	Are calcineurin genes associated with athletic status? A function, replication study.	Polymorphisms in calcineurin genes are candidates to explain individual variations in endurance sports performance owing to the pivotal role that the calcineurin signaling pathway plays in the regulation of important cardiac and skeletal muscle phenotypes. We compared genotypic/allelic frequencies in 55 single nucleotide polymorphisms (SNP) of the five genes (PPP3CA, PPP3CB, PPP3CC, PPP3R1, and P…	Med Sci Sports Exerc	2011	rs3804358	PPP3CA	rs3804358	PPP3CA	rs3804358	---	aerobic exercise
21537387_ABSTRACT_2	21537387	72	101	9606	1636	1	angiotensin converting enzyme	This review considers the 250+ papers concerning the association of the angiotensin converting enzyme (ACE) gene insertion/deletion polymorphism (rs1799752) and various disease conditions published in 2009.	1636	ACE	angiotensin I converting enzyme (peptidyl-dipeptidase A) 1	ACE1|CD143|DCP|DCP1|MGC26566	CD143 antigen|angiotensin I converting enzyme|angiotensin converting enzyme, somatic isoform|carboxycathepsin|dipeptidyl carboxypeptidase 1|kininase II|peptidase P|peptidyl-dipeptidase A|testicular ECA	Implications of the angiotensin converting enzyme gene insertion/deletion polymorphism in health and disease: a snapshot review.	This review considers the 250+ papers concerning the association of the angiotensin converting enzyme (ACE) gene insertion/deletion polymorphism (rs1799752) and various disease conditions published in 2009. The deletion allele occurs in approximately 55% of the population and is associated with increased activity of the ACE enzyme. It might be predicted that the D allele, therefore, might be asso…	Int J Mol Epidemiol Genet	2010	rs1799752	ACE	rs1799752	ACE	rs1799752	---	aerobic exercise
21960661_ABSTRACT_2	21960661	101	105	9606	3990	0.9407	LIPC	Our objective was to test the hypothesis that a common polymorphism in the hepatic lipase (HL) gene (LIPC -514C>T, rs1800588) influences aerobic exercise training-induced changes in TG, very-low-density lipoprotein (VLDL), and high-density lipoprotein (HDL) through genotype-specific increases in lipoprotein lipase (LPL) activity and that sex may affect these responses.	3990	LIPC	lipase, hepatic	HDLCQ12|HL|HTGL|LIPH	lipase C	Hepatic lipase gene -514C>T variant is associated with exercise training-induced changes in VLDL and HDL by lipoprotein lipase.	Our objective was to test the hypothesis that a common polymorphism in the hepatic lipase (HL) gene (LIPC -514C>T, rs1800588) influences aerobic exercise training-induced changes in TG, very-low-density lipoprotein (VLDL), and high-density lipoprotein (HDL) through genotype-specific increases in lipoprotein lipase (LPL) activity and that sex may affect these responses. Seventy-six sedentary overw…	J. Appl. Physiol.	2011	rs1800588	LIPC	rs1800588	LIPC	rs1800588	---	vascular smooth muscle contraction
22012643_ABSTRACT_4	22012643	4	10	9606	1291	0.9407	COL6A1	The COL6A1 rs35796750 polymorphism (IVS32-29 T/C) has been associated with complex phenotypes.	1291	COL6A1	collagen, type VI, alpha 1	OPLL	alpha 1 (VI) chain (61 AA)|collagen VI, alpha-1 polypeptide	COL6A1 gene and Ironman triathlon performance.	Mutations in the type VI collagen gene ( COL6A1) cause myopathy and muscle weakness. In addition, COL6A1 knockout mice were shown to have impaired running performance and reduced muscle strength. The COL6A1 rs35796750 polymorphism (IVS32-29 T/C) has been associated with complex phenotypes. The aim of this study was therefore to determine if this polymorphism is associated with performance during …	Int J Sports Med	2011	rs35796750	COL6A1	rs35796750	COL6A1	rs35796750	---	strength training
22241057_ABSTRACT_6	22241057	87	91	9606	7351	1	UCP2	Of these, 58 were successfully genotyped for the UCP3-55C>T (rs1800849) and 61 for the UCP2-866G>A (rs659366) variant.	7351	UCP2	uncoupling protein 2 (mitochondrial, proton carrier)	BMIQ4|SLC25A8|UCPH	uncoupling protein 2|uncoupling protein-2	Variation in the uncoupling protein 2 and 3 genes and human performance.	Uncoupling proteins 2 and 3 (UCP2 and UCP3) may negatively regulate mitochondrial ATP synthesis and, through this, influence human physical performance. However, human data relating to both these issues remain sparse. Examining the association of common variants in the UCP3/2 locus with performance phenotypes offers one means of investigation. The efficiency of skeletal muscle contraction, delta …	J. Appl. Physiol.	2012	rs659366	UCP2	rs659366	UCP2	rs659366	---	strength training
22749526_ABSTRACT_3	22749526	55	64	9606	2551	1	NRF-2	We compared the genotype and allele frequencies of the NRF-2 A/C (rs12594956), NRF-2 A/G (rs7181866), and NRF-2 C/T (rs8031031) polymorphisms between world-class endurance athletes (n=89), elite power-oriented athletes (n=38), and non-athletic controls (n=110) of the same Caucasian (Spanish) origin.	2551	GABPA	GA binding protein transcription factor, alpha subunit 60kDa	E4TF1-60|E4TF1A|NFT2|NRF2|NRF2A	GA binding protein transcription factor, alpha subunit|OTTHUMP00000096114|human nuclear respiratory factor-2 subunit alpha|nuclear respiratory factor 2 alpha subunit	The rs12594956 polymorphism in the NRF-2 gene is associated with top-level Spanish athlete's performance status.	To determine the association between the nuclear respiratory factor 2 (NRF-2) polymorphisms and elite athletic performance. We compared the genotype and allele frequencies of the NRF-2 A/C (rs12594956), NRF-2 A/G (rs7181866), and NRF-2 C/T (rs8031031) polymorphisms between world-class endurance athletes (n=89), elite power-oriented athletes (n=38), and non-athletic controls (n=110) of the same Ca…	J Sci Med Sport	2013	rs7181866	GABPA	rs7181866	GABPA	rs7181866	rs7181866	strength training
22829935_TITLE_1	22829935	41	46	9606	2180	0.9407	ACSL1	Acyl coenzyme A synthetase long-chain 1 (ACSL1) gene polymorphism (rs6552828) and elite endurance athletic status: a replication study.	2180	ACSL1	acyl-CoA synthetase long-chain family member 1	ACS1|FACL1|FACL2|LACS|LACS1|LACS2	fatty-acid-Coenzyme A ligase, long-chain 1|fatty-acid-Coenzyme A ligase, long-chain 2|lignoceroyl-CoA synthase|long-chain acyl-CoA synthetase 1|long-chain acyl-CoA synthetase 2|long-chain fatty-acid-coenzyme A ligase 1|palmitoyl-CoA ligase 2|paltimoyl-CoA ligase 1	Acyl coenzyme A synthetase long-chain 1 (ACSL1) gene polymorphism (rs6552828) and elite endurance athletic status: a replication study.	The aim of this study was to determine the association between the rs6552828 polymorphism in acyl coenzyme A synthetase (ACSL1) and elite endurance athletic status. We studied 82 Caucasian (Spanish) World/Olympic-class endurance male athletes, and a group of sex and ethnically matched healthy young adults (controls, n=197). The analyses were replicated in a cohort of a different ethnic origin (Ch…	PLoS ONE	2012	rs6552828	ACSL1	rs6552828	ACSL1	rs6552828	---	aerobic exercise
22873651_ABSTRACT_8	22873651	128	162	9606	7124	1	tumor necrosis factor- (TNF)-alpha	The main outcomes are: serum levels of sTNFR-1, sTNFR-2, interleukin (IL)-6, IL-10, measured by the ELISA method; genotyping of tumor necrosis factor- (TNF)-alpha (rs1800629), IL6 (rs1800795), IL10 (rs1800896) by the TaqMan Method (Applied Biosystems, Foster City, CA, USA); and physical performance assessed by Timed Up and Go and 10-Meter Walk Tests.	7124	TNF	tumor necrosis factor (TNF superfamily, member 2)	DIF|TNF-alpha|TNFA|TNFSF2	APC1 protein|OTTHUMP00000029281|OTTHUMP00000037669|TNF superfamily, member 2|TNF, macrophage-derived|TNF, monocyte-derived|cachectin|tumor necrosis factor alpha	Interaction between cytokine gene polymorphisms and the effect of physical exercise on clinical and inflammatory parameters in older women: study protocol for a randomized controlled trial.	Aging is associated with chronic low-grade inflammatory activity with an elevation of cytokine levels. An association between regular physical activity and reduction of blood levels of anti-inflammatory cytokines is demonstrated in the literature pointing to an anti-inflammatory effect related to exercise. However, there is no consensus regarding which type of exercise and which parameters are th…	Trials	2012	rs1800629	TNF	rs1800629	TNF	rs1800629	rs1800629	inflammation
22873651_ABSTRACT_8	22873651	70	75	9606	3569	1	IL-6	The main outcomes are: serum levels of sTNFR-1, sTNFR-2, interleukin (IL)-6, IL-10, measured by the ELISA method; genotyping of tumor necrosis factor- (TNF)-alpha (rs1800629), IL6 (rs1800795), IL10 (rs1800896) by the TaqMan Method (Applied Biosystems, Foster City, CA, USA); and physical performance assessed by Timed Up and Go and 10-Meter Walk Tests.	3569	IL6	interleukin 6 (interferon, beta 2)	BSF2|HGF|HSF|IFNB2|IL-6	interleukin 6	Interaction between cytokine gene polymorphisms and the effect of physical exercise on clinical and inflammatory parameters in older women: study protocol for a randomized controlled trial.	Aging is associated with chronic low-grade inflammatory activity with an elevation of cytokine levels. An association between regular physical activity and reduction of blood levels of anti-inflammatory cytokines is demonstrated in the literature pointing to an anti-inflammatory effect related to exercise. However, there is no consensus regarding which type of exercise and which parameters are th…	Trials	2012	rs1800795	IL6	rs1800795	IL6	rs1800795	rs1800795	inflammation
22873651_ABSTRACT_8	22873651	77	82	9606	3586	0.9407	IL-10	The main outcomes are: serum levels of sTNFR-1, sTNFR-2, interleukin (IL)-6, IL-10, measured by the ELISA method; genotyping of tumor necrosis factor- (TNF)-alpha (rs1800629), IL6 (rs1800795), IL10 (rs1800896) by the TaqMan Method (Applied Biosystems, Foster City, CA, USA); and physical performance assessed by Timed Up and Go and 10-Meter Walk Tests.	3586	IL10	interleukin 10	CSIF|IL-10|IL10A|MGC126450|MGC126451|TGIF	cytokine synthesis inhibitory factor	Interaction between cytokine gene polymorphisms and the effect of physical exercise on clinical and inflammatory parameters in older women: study protocol for a randomized controlled trial.	Aging is associated with chronic low-grade inflammatory activity with an elevation of cytokine levels. An association between regular physical activity and reduction of blood levels of anti-inflammatory cytokines is demonstrated in the literature pointing to an anti-inflammatory effect related to exercise. However, there is no consensus regarding which type of exercise and which parameters are th…	Trials	2012	rs1800896	IL10	rs1800896	IL10	rs1800896	---	inflammation
22899923_ABSTRACT_10	22899923	4	9	9606	9353	0.9407	SLIT2	The SLIT2 SNP rs1379659 and the FAM5C SNP rs1935881 were associated with norepinephrine change during exercise.	9353	SLIT2	slit homolog 2 (Drosophila)	FLJ14420|SLIL3|Slit-2	slit homolog 2	Genetic Influences on Physiological and Subjective Responses to an Aerobic Exercise Session among Sedentary Adults.	Objective. To determine whether genetic variants suggested by the literature to be associated with physiology and fitness phenotypes predicted differential physiological and subjective responses to a bout of aerobic exercise among inactive but otherwise healthy adults. Method. Participants completed a 30-minute submaximal aerobic exercise session. Measures of physiological and subjective respondi…	J Cancer Epidemiol	2012	rs1379659	SLIT2	rs1379659	SLIT2	rs1379659	---	aerobic exercise
22899923_ABSTRACT_11	22899923	13	18	9606	4988	0.9407	OPRM1	Finally, the OPRM1 SNP rs1799971 was related to changes in norepinephrine, lactate, and rate of perceived exertion (RPE) during exercise.	4988	OPRM1	opioid receptor, mu 1	KIAA0403|MOR|MOR1|OPRM	mu opiate receptor	Genetic Influences on Physiological and Subjective Responses to an Aerobic Exercise Session among Sedentary Adults.	Objective. To determine whether genetic variants suggested by the literature to be associated with physiology and fitness phenotypes predicted differential physiological and subjective responses to a bout of aerobic exercise among inactive but otherwise healthy adults. Method. Participants completed a 30-minute submaximal aerobic exercise session. Measures of physiological and subjective respondi…	J Cancer Epidemiol	2012	rs1799971	OPRM1	rs1799971	OPRM1	rs1799971	---	aerobic exercise
22899923_ABSTRACT_10	22899923	32	37	9606	339479	0.5704	FAM5C	The SLIT2 SNP rs1379659 and the FAM5C SNP rs1935881 were associated with norepinephrine change during exercise.	339479	FAM5C	family with sequence similarity 5, member C	BRINP3|DBCCR1L|DBCCR1L1|RP11-445K1.1	OTTHUMP00000033554	Genetic Influences on Physiological and Subjective Responses to an Aerobic Exercise Session among Sedentary Adults.	Objective. To determine whether genetic variants suggested by the literature to be associated with physiology and fitness phenotypes predicted differential physiological and subjective responses to a bout of aerobic exercise among inactive but otherwise healthy adults. Method. Participants completed a 30-minute submaximal aerobic exercise session. Measures of physiological and subjective respondi…	J Cancer Epidemiol	2012	rs1935881	FAM5C	rs1935881	FAM5C	rs1935881	---	aerobic exercise
22899923_ABSTRACT_9	22899923	16	21	9606	1385	0.9407	CREB1	Two SNPs in the CREB1 gene (rs2253206 and 2360969) were related to change in temperature during exercise and with maximal oxygen capacity (VO(2) max).	1385	CREB1	cAMP responsive element binding protein 1	CREB|MGC9284	active transcription factor CREB|cAMP-response element-binding protein-1|transactivator protein	Genetic Influences on Physiological and Subjective Responses to an Aerobic Exercise Session among Sedentary Adults.	Objective. To determine whether genetic variants suggested by the literature to be associated with physiology and fitness phenotypes predicted differential physiological and subjective responses to a bout of aerobic exercise among inactive but otherwise healthy adults. Method. Participants completed a 30-minute submaximal aerobic exercise session. Measures of physiological and subjective respondi…	J Cancer Epidemiol	2012	rs2253206	CREB1	rs2253206	CREB1	rs2253206	---	aerobic exercise
22899923_ABSTRACT_9	22899923	16	21	9606	1385	0.9407	CREB1	Two SNPs in the CREB1 gene (rs2253206 and 2360969) were related to change in temperature during exercise and with maximal oxygen capacity (VO(2) max).	1385	CREB1	cAMP responsive element binding protein 1	CREB|MGC9284	active transcription factor CREB|cAMP-response element-binding protein-1|transactivator protein	Genetic Influences on Physiological and Subjective Responses to an Aerobic Exercise Session among Sedentary Adults.	Objective. To determine whether genetic variants suggested by the literature to be associated with physiology and fitness phenotypes predicted differential physiological and subjective responses to a bout of aerobic exercise among inactive but otherwise healthy adults. Method. Participants completed a 30-minute submaximal aerobic exercise session. Measures of physiological and subjective respondi…	J Cancer Epidemiol	2012	rs2360969	CREB1	rs2360969	CREB1	rs2360969	---	aerobic exercise
22899923_ABSTRACT_8	22899923	30	33	9606	79068	0.9407	FTO	We found that two SNPs in the FTO gene (rs8044769 and rs3751812) were related to positive affect change during exercise.	79068	FTO	fat mass and obesity associated	KIAA1752|MGC5149	-	Genetic Influences on Physiological and Subjective Responses to an Aerobic Exercise Session among Sedentary Adults.	Objective. To determine whether genetic variants suggested by the literature to be associated with physiology and fitness phenotypes predicted differential physiological and subjective responses to a bout of aerobic exercise among inactive but otherwise healthy adults. Method. Participants completed a 30-minute submaximal aerobic exercise session. Measures of physiological and subjective respondi…	J Cancer Epidemiol	2012	rs3751812	FTO	rs3751812	FTO	rs3751812	---	aerobic exercise
22899923_ABSTRACT_8	22899923	30	33	9606	79068	0.9407	FTO	We found that two SNPs in the FTO gene (rs8044769 and rs3751812) were related to positive affect change during exercise.	79068	FTO	fat mass and obesity associated	KIAA1752|MGC5149	-	Genetic Influences on Physiological and Subjective Responses to an Aerobic Exercise Session among Sedentary Adults.	Objective. To determine whether genetic variants suggested by the literature to be associated with physiology and fitness phenotypes predicted differential physiological and subjective responses to a bout of aerobic exercise among inactive but otherwise healthy adults. Method. Participants completed a 30-minute submaximal aerobic exercise session. Measures of physiological and subjective respondi…	J Cancer Epidemiol	2012	rs8044769	FTO	rs8044769	FTO	rs8044769	---	aerobic exercise
23572278_ABSTRACT_7	23572278	12	16	9606	4842	1	NOS1	In addition NOS1 rs1879417 was also found to be associated with a lower cognitive performance, while NOS2 rs2297518 polymorphism showed to be associated with physical performance.	4842	NOS1	nitric oxide synthase 1 (neuronal)	IHPS1|NOS|nNOS	neuronal nitric oxide synthase	Common polymorphisms in nitric oxide synthase (NOS) genes influence quality of aging and longevity in humans.	Nitric oxide (NO) triggers multiple signal transduction pathways and contributes to the control of numerous cellular functions. Previous studies have shown in model organisms that the alteration of NO production has important effects on aging and lifespan. We studied in a large sample (763 subjects, age range 19-107聽years) the variability of the three human genes (NOS1, -2, -3) coding for the thr…	Biogerontology	2013	rs1879417	NOS1	rs1879417	NOS1	rs1879417	---	vascular smooth muscle contraction
23572278_ABSTRACT_7	23572278	101	105	9606	4843	1	NOS2	In addition NOS1 rs1879417 was also found to be associated with a lower cognitive performance, while NOS2 rs2297518 polymorphism showed to be associated with physical performance.	4843	NOS2	nitric oxide synthase 2, inducible	HEP-NOS|INOS|NOS|NOS2A	NOS, type II|nitric oxide synthase 2A|nitric oxide synthase 2A (inducible, hepatocytes)|nitric oxide synthase, macrophage	Common polymorphisms in nitric oxide synthase (NOS) genes influence quality of aging and longevity in humans.	Nitric oxide (NO) triggers multiple signal transduction pathways and contributes to the control of numerous cellular functions. Previous studies have shown in model organisms that the alteration of NO production has important effects on aging and lifespan. We studied in a large sample (763 subjects, age range 19-107聽years) the variability of the three human genes (NOS1, -2, -3) coding for the thr…	Biogerontology	2013	rs2297518	NOS2	rs2297518	NOS2	rs2297518	---	vascular smooth muscle contraction
23628675_ABSTRACT_3	23628675	43	47	9606	6566	1	MCT1	The A1470T polymorphism (rs1049434) in the MCT1 gene was shown to be associated with lactate transport rates in human skeletal muscles.	6566	SLC16A1	solute carrier family 16, member 1 (monocarboxylic acid transporter 1)	FLJ36745|HHF7|MCT|MCT1|MGC44475	OTTHUMP00000013960|monocarboxylate transporter 1|solute carrier family 16 (monocarboxylic acid transporters), member 1|solute carrier family 16, member 1	A common polymorphism of the MCT1 gene and athletic performance.	In red skeletal muscle, monocarboxylate transporter 1 (MCT1) is required for lactate to enter the myocytes for oxidation. The A1470T polymorphism (rs1049434) in the MCT1 gene was shown to be associated with lactate transport rates in human skeletal muscles. The aim of the study was to compare genotype and allele frequencies of the MCT1 gene polymorphism in 323 Russian athletes and 467 nonathletic…	Int J Sports Physiol Perform	2014	rs1049434	SLC16A1	rs1049434	SLC16A1	rs1049434	rs1049434	lactic acid
23681449_ABSTRACT_7	23681449	217	222	9606	270	0.9407	AMPD1	The angiotensin-1 converting enzyme insertion/deletion polymorphism (ACE I/D, registered single nucleotide polymorphism [rs]4646994), angiotensinogen (AGT Met235Thr rs699), skeletal adenosine monophosphate deaminase (AMPD1) Gln(Q)12Ter(X) [also termed C34T, rs17602729], interleukin-6 (IL-6 -174 G/C, rs1800795), endothelial nitric oxide synthase 3 (NOS3 -786 T/C, rs2070744; and Glu298Asp, rs179998…	270	AMPD1	adenosine monophosphate deaminase 1 (isoform M)	MAD|MADA	OTTHUMP00000013665|OTTHUMP00000059283|adenosine monophosphate deaminase-1 (muscle)	Genes for elite power and sprint performance: ACTN3 leads the way.	The ability of skeletal muscles to produce force at a high velocity, which is crucial for success in power and sprint performance, is strongly influenced by genetics and without the appropriate genetic make-up, an individual reduces his/her chances of becoming an exceptional power or sprinter athlete. Several genetic variants (i.e. polymorphisms) have been associated with elite power and sprint p…	Sports Med	2013	rs17602729	AMPD1	rs17602729	AMPD1	rs17602729	rs17602729	cardiopulmonary function#strength training#anaerobic exercise
23681449_ABSTRACT_7	23681449	350	354	9606	4846	1	NOS3	The angiotensin-1 converting enzyme insertion/deletion polymorphism (ACE I/D, registered single nucleotide polymorphism [rs]4646994), angiotensinogen (AGT Met235Thr rs699), skeletal adenosine monophosphate deaminase (AMPD1) Gln(Q)12Ter(X) [also termed C34T, rs17602729], interleukin-6 (IL-6 -174 G/C, rs1800795), endothelial nitric oxide synthase 3 (NOS3 -786 T/C, rs2070744; and Glu298Asp, rs179998…	4846	NOS3	nitric oxide synthase 3 (endothelial cell)	ECNOS|eNOS	endothelial nitric oxidase synthase|endothelial nitric oxide synthase	Genes for elite power and sprint performance: ACTN3 leads the way.	The ability of skeletal muscles to produce force at a high velocity, which is crucial for success in power and sprint performance, is strongly influenced by genetics and without the appropriate genetic make-up, an individual reduces his/her chances of becoming an exceptional power or sprinter athlete. Several genetic variants (i.e. polymorphisms) have been associated with elite power and sprint p…	Sports Med	2013	rs1799983	NOS3	rs1799983	NOS3	rs1799983	---	vascular smooth muscle contraction
23681449_ABSTRACT_7	23681449	522	526	9606	7351	1	PPARA	The angiotensin-1 converting enzyme insertion/deletion polymorphism (ACE I/D, registered single nucleotide polymorphism [rs]4646994), angiotensinogen (AGT Met235Thr rs699), skeletal adenosine monophosphate deaminase (AMPD1) Gln(Q)12Ter(X) [also termed C34T, rs17602729], interleukin-6 (IL-6 -174 G/C, rs1800795), endothelial nitric oxide synthase 3 (NOS3 -786 T/C, rs2070744; and Glu298Asp, rs179998…	5465	PPARA	peroxisome proliferator-activated receptor alpha	MGC2237|MGC2452|NR1C1|PPAR|hPPAR	OTTHUMP00000028713|OTTHUMP00000042872|peroxisome proliferative activated receptor, alpha|peroxisome proliferator activated receptor alpha	Genes for elite power and sprint performance: ACTN3 leads the way.	The ability of skeletal muscles to produce force at a high velocity, which is crucial for success in power and sprint performance, is strongly influenced by genetics and without the appropriate genetic make-up, an individual reduces his/her chances of becoming an exceptional power or sprinter athlete. Several genetic variants (i.e. polymorphisms) have been associated with elite power and sprint p…	Sports Med	2013	rs4253778	PPARA	rs4253778	PPARA	rs4253778	---	strength training
23681449_ABSTRACT_7	23681449	134	149	9606	183	0.9407	angiotensin-1 converting enzyme	The angiotensin-1 converting enzyme insertion/deletion polymorphism (ACE I/D, registered single nucleotide polymorphism [rs]4646994), angiotensinogen (AGT Met235Thr rs699), skeletal adenosine monophosphate deaminase (AMPD1) Gln(Q)12Ter(X) [also termed C34T, rs17602729], interleukin-6 (IL-6 -174 G/C, rs1800795), endothelial nitric oxide synthase 3 (NOS3 -786 T/C, rs2070744; and Glu298Asp, rs179998…	1636	ACE	angiotensin I converting enzyme (peptidyl-dipeptidase A) 1	ACE1|CD143|DCP|DCP1|MGC26566	CD143 antigen|angiotensin I converting enzyme|angiotensin converting enzyme, somatic isoform|carboxycathepsin|dipeptidyl carboxypeptidase 1|kininase II|peptidase P|peptidyl-dipeptidase A|testicular ECA	Genes for elite power and sprint performance: ACTN3 leads the way.	The ability of skeletal muscles to produce force at a high velocity, which is crucial for success in power and sprint performance, is strongly influenced by genetics and without the appropriate genetic make-up, an individual reduces his/her chances of becoming an exceptional power or sprinter athlete. Several genetic variants (i.e. polymorphisms) have been associated with elite power and sprint p…	Sports Med	2013	rs4646994	ACE	rs4646994	ACE	rs4646994	---	vascular smooth muscle contraction
23681449_ABSTRACT_7	23681449	486	520	9606	7351	1	mitochondrial uncoupling protein 2	The angiotensin-1 converting enzyme insertion/deletion polymorphism (ACE I/D, registered single nucleotide polymorphism [rs]4646994), angiotensinogen (AGT Met235Thr rs699), skeletal adenosine monophosphate deaminase (AMPD1) Gln(Q)12Ter(X) [also termed C34T, rs17602729], interleukin-6 (IL-6 -174 G/C, rs1800795), endothelial nitric oxide synthase 3 (NOS3 -786 T/C, rs2070744; and Glu298Asp, rs179998…	7351	UCP2	uncoupling protein 2 (mitochondrial, proton carrier)	BMIQ4|SLC25A8|UCPH	uncoupling protein 2|uncoupling protein-2	Genes for elite power and sprint performance: ACTN3 leads the way.	The ability of skeletal muscles to produce force at a high velocity, which is crucial for success in power and sprint performance, is strongly influenced by genetics and without the appropriate genetic make-up, an individual reduces his/her chances of becoming an exceptional power or sprinter athlete. Several genetic variants (i.e. polymorphisms) have been associated with elite power and sprint p…	Sports Med	2013	rs660339	UCP2	rs660339	UCP2	rs660339	---	strength training
23850449_ABSTRACT_4	23850449	71	76	9606	3479	1	IGF-I	C-1245T (rs35767) is a genetic variation in the promoter region of the IGF-I gene.	3479	IGF1	insulin-like growth factor 1 (somatomedin C)	IGFI	insulin-like growth factor 1|somatomedin C	Can IGF-I polymorphism affect power and endurance athletic performance?	Insulin-like growth factor-I (IGF-I) plays a key role in exercise-associated muscle growth and development. The regulatory region of the promoter of the IGF-I gene is labile, but changes in this region were studied mostly in the elderly and in relation to pathological states. C-1245T (rs35767) is a genetic variation in the promoter region of the IGF-I gene. The minor allele T was found to be asso…	Growth Horm. IGF Res.	2013	rs35767	IGF1	rs35767	IGF1	rs35767	---	aerobic exercise
24015812_TITLE_1	24015812	19	24	9606	4524	0.9407	MTHFR	Association of the MTHFR 1298A>C (rs1801131) polymorphism with speed and strength sports in Russian and Polish athletes.	4524	MTHFR	5,10-methylenetetrahydrofolate reductase (NADPH)	-	OTTHUMP00000002367|OTTHUMP00000002368|methylenetetrahydrofolate reductase intermediate form	Association of the MTHFR 1298A>C (rs1801131) polymorphism with speed and strength sports in Russian and Polish athletes.	It has been suggested that DNA hypomethylation because of poorer effectiveness of the 5,10-methylenetetrahydrofolate reductase (MTHFR) enzyme induces muscular growth. We hypothesised that the common, functional 1298A>C polymorphism in the MTHFR gene is associated with athletic status. To test this hypothesis, we investigated the distribution of the 1298A>C variant in Polish (n = 302) and Russian …	J Sports Sci	2014	rs1801131	MTHFR	rs1801131	MTHFR	rs1801131	rs1801131	cardiopulmonary function#CRP-levels
24118591_ABSTRACT_5	24118591	13	18	9606	5467	1	PPARD	Furthermore, PPARD A/C/C haplotype (rs2267668/rs2016520/rs1053049) was significantly underrepresented in all athletes and each subgroup of athletes when compared with controls (P < 0.000001), suggesting that harboring this specific haplotype is unfavorable for becoming an elite athlete.	5467	PPARD	peroxisome proliferator-activated receptor delta	FAAR|MGC3931|NR1C2|NUC1|NUCI|NUCII|PPAR-beta|PPARB	OTTHUMP00000016256|nuclear hormone receptor 1|peroxisome proliferative activated receptor, delta	Genomic haplotype within the Peroxisome Proliferator-Activated Receptor Delta (PPARD) gene is associated with elite athletic status.	Peroxisome proliferator-activated receptor delta (PPAR未; encoded by the PPARD gene) plays a role in energy metabolism and mitochondrial function. We have investigated the distribution of PPARD rs2267668, rs2016520 and rs1053049 polymorphisms, individually and in haplotype, in a cohort of 660 elite athletes which was subdivided into four different groups based on the different metabolic demands of…	Scand J Med Sci Sports	2014	rs1053049	PPARD	rs1053049	PPARD	rs1053049	---	strength training
24118591_ABSTRACT_4	24118591	0	5	9606	5467	1	PPARD	PPARD rs2016529 and rs1053049 were individually associated with overall elite athletic performance (P = 0.00002; and P = 0.0002) and also with athletes grouped as strength endurance (P = 0.00008; and P = 0.0003).	5467	PPARD	peroxisome proliferator-activated receptor delta	FAAR|MGC3931|NR1C2|NUC1|NUCI|NUCII|PPAR-beta|PPARB	OTTHUMP00000016256|nuclear hormone receptor 1|peroxisome proliferative activated receptor, delta	Genomic haplotype within the Peroxisome Proliferator-Activated Receptor Delta (PPARD) gene is associated with elite athletic status.	Peroxisome proliferator-activated receptor delta (PPAR未; encoded by the PPARD gene) plays a role in energy metabolism and mitochondrial function. We have investigated the distribution of PPARD rs2267668, rs2016520 and rs1053049 polymorphisms, individually and in haplotype, in a cohort of 660 elite athletes which was subdivided into four different groups based on the different metabolic demands of…	Scand J Med Sci Sports	2014	rs2016529	PPARD	rs2016529	PPARD	rs2016529	---	strength training
24533495_ABSTRACT_2	24533495	20	26	9606	6517	0.9407	SLC2A4	The G/A mutation in SLC2A4 promoter, rs5418, was investigated to assess the relationship between the SLC2A4 gene and aerobic endurance in the muscle uptake of glucose.	6517	SLC2A4	solute carrier family 2 (facilitated glucose transporter), member 4	GLUT4	glucose transporter 4|insulin-responsive glucose transporter type 4	A functional promoter polymorphism of SLC2A4 is associated with aerobic endurance in a Chinese population.	The G/A mutation in SLC2A4 promoter, rs5418, was investigated to assess the relationship between the SLC2A4 gene and aerobic endurance in the muscle uptake of glucose. Genotypic/allelic frequencies of rs5418 in SLC2A4 in 102 top-level long-distance runners (53 men and 49 women) were compared with those of 206 healthy controls (118 men and 88 women) from the same ethnic background (Han Chinese). T…	Eur J Sport Sci	2014	rs5418	SLC2A4	rs5418	SLC2A4	rs5418	---	lactic acid
24745653_TITLE_1	24745653	0	14	9606	3480	1	IGF-I receptor	IGF-I receptor 275124A>C (rs1464430) polymorphism and athletic performance.	3480	IGF1R	insulin-like growth factor 1 receptor	CD221|IGFIR|JTK13|MGC142170|MGC142172|MGC18216	soluble IGF1R variant 1|soluble IGF1R variant 2	IGF-I receptor 275124A>C (rs1464430) polymorphism and athletic performance.	To examine the prevalence of the Insulin-Like Growth Factor-I receptor (IGF-IR) 275124A>C polymorphism, known to be associated with exercise-related cardiac hypertrophy, among elite endurance and power athletes. One hundred and fifty-nine athletes (118 men and 41 women, age: 35.9卤12.2 yrs) participated in the study. We hypothesized that presence of the A allele will be significantly more common a…	J Sci Med Sport	2015	rs1464430	IGF1R	rs1464430	IGF1R	rs1464430	---	aerobic exercise
24884370_ABSTRACT_3	24884370	92	97	9606	2034	0.9407	EPAS1	Using innovative statistical methods we compared genotype distributions and interactions of EPAS1 SNPs rs1867785, rs11689011, rs895436, rs4035887 and rs1867782 between sprint/power athletes (n=338), endurance athletes (n=254), and controls (603) in Polish and Russian samples.	2034	EPAS1	endothelial PAS domain protein 1	ECYT4|HIF2A|HLF|MOP2|PASD2|bHLHe73	HIF-1alpha-like factor	EPAS1 gene variants are associated with sprint/power athletic performance in two cohorts of European athletes.	The endothelial PAS domain protein 1 (EPAS1) activates genes that are involved in erythropoiesis and angiogenesis, thus favoring a better delivery of oxygen to the tissues and is a plausible candidate to influence athletic performance. Using innovative statistical methods we compared genotype distributions and interactions of EPAS1 SNPs rs1867785, rs11689011, rs895436, rs4035887 and rs1867782 bet…	BMC Genomics	2014	rs11689011	EPAS1	rs11689011	EPAS1	rs11689011	---	vascular smooth muscle contraction
24884370_ABSTRACT_3	24884370	92	97	9606	2034	0.9407	EPAS1	Using innovative statistical methods we compared genotype distributions and interactions of EPAS1 SNPs rs1867785, rs11689011, rs895436, rs4035887 and rs1867782 between sprint/power athletes (n=338), endurance athletes (n=254), and controls (603) in Polish and Russian samples.	2034	EPAS1	endothelial PAS domain protein 1	ECYT4|HIF2A|HLF|MOP2|PASD2|bHLHe73	HIF-1alpha-like factor	EPAS1 gene variants are associated with sprint/power athletic performance in two cohorts of European athletes.	The endothelial PAS domain protein 1 (EPAS1) activates genes that are involved in erythropoiesis and angiogenesis, thus favoring a better delivery of oxygen to the tissues and is a plausible candidate to influence athletic performance. Using innovative statistical methods we compared genotype distributions and interactions of EPAS1 SNPs rs1867785, rs11689011, rs895436, rs4035887 and rs1867782 bet…	BMC Genomics	2014	rs1867782	EPAS1	rs1867782	EPAS1	rs1867782	---	vascular smooth muscle contraction
24884370_ABSTRACT_3	24884370	92	97	9606	2034	0.9407	EPAS1	Using innovative statistical methods we compared genotype distributions and interactions of EPAS1 SNPs rs1867785, rs11689011, rs895436, rs4035887 and rs1867782 between sprint/power athletes (n=338), endurance athletes (n=254), and controls (603) in Polish and Russian samples.	2034	EPAS1	endothelial PAS domain protein 1	ECYT4|HIF2A|HLF|MOP2|PASD2|bHLHe73	HIF-1alpha-like factor	EPAS1 gene variants are associated with sprint/power athletic performance in two cohorts of European athletes.	The endothelial PAS domain protein 1 (EPAS1) activates genes that are involved in erythropoiesis and angiogenesis, thus favoring a better delivery of oxygen to the tissues and is a plausible candidate to influence athletic performance. Using innovative statistical methods we compared genotype distributions and interactions of EPAS1 SNPs rs1867785, rs11689011, rs895436, rs4035887 and rs1867782 bet…	BMC Genomics	2014	rs1867785	EPAS1	rs1867785	EPAS1	rs1867785	---	vascular smooth muscle contraction
24884370_ABSTRACT_3	24884370	92	97	9606	2034	0.9407	EPAS1	Using innovative statistical methods we compared genotype distributions and interactions of EPAS1 SNPs rs1867785, rs11689011, rs895436, rs4035887 and rs1867782 between sprint/power athletes (n=338), endurance athletes (n=254), and controls (603) in Polish and Russian samples.	2034	EPAS1	endothelial PAS domain protein 1	ECYT4|HIF2A|HLF|MOP2|PASD2|bHLHe73	HIF-1alpha-like factor	EPAS1 gene variants are associated with sprint/power athletic performance in two cohorts of European athletes.	The endothelial PAS domain protein 1 (EPAS1) activates genes that are involved in erythropoiesis and angiogenesis, thus favoring a better delivery of oxygen to the tissues and is a plausible candidate to influence athletic performance. Using innovative statistical methods we compared genotype distributions and interactions of EPAS1 SNPs rs1867785, rs11689011, rs895436, rs4035887 and rs1867782 bet…	BMC Genomics	2014	rs4035887	EPAS1	rs4035887	EPAS1	rs4035887	---	vascular smooth muscle contraction
24884370_ABSTRACT_3	24884370	92	97	9606	2034	0.9407	EPAS1	Using innovative statistical methods we compared genotype distributions and interactions of EPAS1 SNPs rs1867785, rs11689011, rs895436, rs4035887 and rs1867782 between sprint/power athletes (n=338), endurance athletes (n=254), and controls (603) in Polish and Russian samples.	2034	EPAS1	endothelial PAS domain protein 1	ECYT4|HIF2A|HLF|MOP2|PASD2|bHLHe73	HIF-1alpha-like factor	EPAS1 gene variants are associated with sprint/power athletic performance in two cohorts of European athletes.	The endothelial PAS domain protein 1 (EPAS1) activates genes that are involved in erythropoiesis and angiogenesis, thus favoring a better delivery of oxygen to the tissues and is a plausible candidate to influence athletic performance. Using innovative statistical methods we compared genotype distributions and interactions of EPAS1 SNPs rs1867785, rs11689011, rs895436, rs4035887 and rs1867782 bet…	BMC Genomics	2014	rs895436	EPAS1	rs895436	EPAS1	rs895436	---	vascular smooth muscle contraction
24887114_ABSTRACT_5	24887114	50	80	9606	186	1	angiotensin II type 2 receptor	We found that rs11091046 C allele carriers of the angiotensin II type 2 receptor gene (AGTR2; involved in skeletal muscle development, metabolism and circulatory homeostasis) had a significantly higher percentage of slow-twitch fibres than A allele carriers [54.2 (11.1) versus 45.2 (10.2)%; P = 0.003].	186	AGTR2	angiotensin II receptor, type 2	AT2|ATGR2|MRX88	OTTHUMP00000023878|angiotensin receptor 2	AGTR2 gene polymorphism is associated with muscle fibre composition, athletic status and aerobic performance.	Muscle fibre type is a heritable trait and can partly predict athletic success. It has been proposed that polymorphisms of genes involved in the regulation of muscle fibre characteristics may predispose the muscle precursor cells of a given individual to be predominantly fast or slow. In the present study, we examined the association between 15 candidate gene polymorphisms and muscle fibre type c…	Exp. Physiol.	2014	rs11091046	AGTR2	rs11091046	AGTR2	rs11091046	---	vascular smooth muscle contraction
25170593_ABSTRACT_8	25170593	95	103	9606	10891	0.9407	PPARGC1A	Using functional genomics tool, the following SNPs were found to have functional significance: PPARGC1A rs6821591, rs12650562, rs12374310, rs4697425, rs13113110, and rs4452416; PPARGC1B rs251466 and rs17110586; and PPRC1 rs17114388 (all P鈥?鈥?.001).	10891	PPARGC1A	peroxisome proliferator-activated receptor gamma, coactivator 1 alpha	LEM6|PGC-1(alpha)|PGC-1v|PGC1|PGC1A|PPARGC1	OTTHUMP00000123372|PPAR gamma coactivator variant form|PPAR gamma coactivator-1|ligand effect modulator-6|peroxisome proliferative activated receptor, gamma, coactivator 1, alpha	PGC-related gene variants and elite endurance athletic status in a Chinese cohort: a functional study.	This study aims to examine the association between proliferator-activated receptor 纬 (PGC)-gene family-related single nucleotide polymorphisms (SNPs) and elite endurance runners' status in a Chinese cohort, and to gain insights into the functionality of a subset of SNPs. Genotype distributions of 133 SNPs in PPARGC1A, PPARGC1B, PPRC1, TFAM, TFB1M, TFB2M, NRF1, GABPA, GABPB1, ERR伪, and SIRT1 genes…	Scand J Med Sci Sports	2015	rs12374310	PPARGC1A	rs12374310	PPARGC1A	rs12374310	---	strength training
25170593_ABSTRACT_8	25170593	95	103	9606	10891	0.9407	PPARGC1A	Using functional genomics tool, the following SNPs were found to have functional significance: PPARGC1A rs6821591, rs12650562, rs12374310, rs4697425, rs13113110, and rs4452416; PPARGC1B rs251466 and rs17110586; and PPRC1 rs17114388 (all P鈥?鈥?.001).	10891	PPARGC1A	peroxisome proliferator-activated receptor gamma, coactivator 1 alpha	LEM6|PGC-1(alpha)|PGC-1v|PGC1|PGC1A|PPARGC1	OTTHUMP00000123372|PPAR gamma coactivator variant form|PPAR gamma coactivator-1|ligand effect modulator-6|peroxisome proliferative activated receptor, gamma, coactivator 1, alpha	PGC-related gene variants and elite endurance athletic status in a Chinese cohort: a functional study.	This study aims to examine the association between proliferator-activated receptor 纬 (PGC)-gene family-related single nucleotide polymorphisms (SNPs) and elite endurance runners' status in a Chinese cohort, and to gain insights into the functionality of a subset of SNPs. Genotype distributions of 133 SNPs in PPARGC1A, PPARGC1B, PPRC1, TFAM, TFB1M, TFB2M, NRF1, GABPA, GABPB1, ERR伪, and SIRT1 genes…	Scand J Med Sci Sports	2015	rs12650562	PPARGC1A	rs12650562	PPARGC1A	rs12650562	---	strength training
25170593_ABSTRACT_8	25170593	95	103	9606	10891	0.9407	PPARGC1A	Using functional genomics tool, the following SNPs were found to have functional significance: PPARGC1A rs6821591, rs12650562, rs12374310, rs4697425, rs13113110, and rs4452416; PPARGC1B rs251466 and rs17110586; and PPRC1 rs17114388 (all P鈥?鈥?.001).	10891	PPARGC1A	peroxisome proliferator-activated receptor gamma, coactivator 1 alpha	LEM6|PGC-1(alpha)|PGC-1v|PGC1|PGC1A|PPARGC1	OTTHUMP00000123372|PPAR gamma coactivator variant form|PPAR gamma coactivator-1|ligand effect modulator-6|peroxisome proliferative activated receptor, gamma, coactivator 1, alpha	PGC-related gene variants and elite endurance athletic status in a Chinese cohort: a functional study.	This study aims to examine the association between proliferator-activated receptor 纬 (PGC)-gene family-related single nucleotide polymorphisms (SNPs) and elite endurance runners' status in a Chinese cohort, and to gain insights into the functionality of a subset of SNPs. Genotype distributions of 133 SNPs in PPARGC1A, PPARGC1B, PPRC1, TFAM, TFB1M, TFB2M, NRF1, GABPA, GABPB1, ERR伪, and SIRT1 genes…	Scand J Med Sci Sports	2015	rs13113110	PPARGC1A	rs13113110	PPARGC1A	rs13113110	---	strength training
25170593_ABSTRACT_8	25170593	177	185	9606	133522	0.9407	PPARGC1B	Using functional genomics tool, the following SNPs were found to have functional significance: PPARGC1A rs6821591, rs12650562, rs12374310, rs4697425, rs13113110, and rs4452416; PPARGC1B rs251466 and rs17110586; and PPRC1 rs17114388 (all P鈥?鈥?.001).	133522	PPARGC1B	peroxisome proliferator-activated receptor gamma, coactivator 1 beta	ERRL1|PERC|PGC-1(beta)|PGC1B	PGC-1-related estrogen receptor alpha coactivator|peroxisome proliferative activated receptor, gamma, coactivator 1, beta	PGC-related gene variants and elite endurance athletic status in a Chinese cohort: a functional study.	This study aims to examine the association between proliferator-activated receptor 纬 (PGC)-gene family-related single nucleotide polymorphisms (SNPs) and elite endurance runners' status in a Chinese cohort, and to gain insights into the functionality of a subset of SNPs. Genotype distributions of 133 SNPs in PPARGC1A, PPARGC1B, PPRC1, TFAM, TFB1M, TFB2M, NRF1, GABPA, GABPB1, ERR伪, and SIRT1 genes…	Scand J Med Sci Sports	2015	rs17110586	PPARGC1B	rs17110586	PPARGC1B	rs17110586	---	strength training
25170593_ABSTRACT_8	25170593	215	220	9606	23082	0.9407	PPRC1	Using functional genomics tool, the following SNPs were found to have functional significance: PPARGC1A rs6821591, rs12650562, rs12374310, rs4697425, rs13113110, and rs4452416; PPARGC1B rs251466 and rs17110586; and PPRC1 rs17114388 (all P鈥?鈥?.001).	23082	PPRC1	peroxisome proliferator-activated receptor gamma, coactivator-related 1	KIAA0595|MGC74642|PRC|RP11-302K17.6	OTTHUMP00000020358|PGC-1 related co-activator|peroxisome proliferative activated receptor, gamma, coactivator-related 1	PGC-related gene variants and elite endurance athletic status in a Chinese cohort: a functional study.	This study aims to examine the association between proliferator-activated receptor 纬 (PGC)-gene family-related single nucleotide polymorphisms (SNPs) and elite endurance runners' status in a Chinese cohort, and to gain insights into the functionality of a subset of SNPs. Genotype distributions of 133 SNPs in PPARGC1A, PPARGC1B, PPRC1, TFAM, TFB1M, TFB2M, NRF1, GABPA, GABPB1, ERR伪, and SIRT1 genes…	Scand J Med Sci Sports	2015	rs17114388	PPRC1	rs17114388	PPRC1	rs17114388	---	strength training
25170593_ABSTRACT_8	25170593	177	185	9606	133522	0.9407	PPARGC1B	Using functional genomics tool, the following SNPs were found to have functional significance: PPARGC1A rs6821591, rs12650562, rs12374310, rs4697425, rs13113110, and rs4452416; PPARGC1B rs251466 and rs17110586; and PPRC1 rs17114388 (all P鈥?鈥?.001).	133522	PPARGC1B	peroxisome proliferator-activated receptor gamma, coactivator 1 beta	ERRL1|PERC|PGC-1(beta)|PGC1B	PGC-1-related estrogen receptor alpha coactivator|peroxisome proliferative activated receptor, gamma, coactivator 1, beta	PGC-related gene variants and elite endurance athletic status in a Chinese cohort: a functional study.	This study aims to examine the association between proliferator-activated receptor 纬 (PGC)-gene family-related single nucleotide polymorphisms (SNPs) and elite endurance runners' status in a Chinese cohort, and to gain insights into the functionality of a subset of SNPs. Genotype distributions of 133 SNPs in PPARGC1A, PPARGC1B, PPRC1, TFAM, TFB1M, TFB2M, NRF1, GABPA, GABPB1, ERR伪, and SIRT1 genes…	Scand J Med Sci Sports	2015	rs251466	PPARGC1B	rs251466	PPARGC1B	rs251466	---	strength training
25170593_ABSTRACT_8	25170593	95	103	9606	10891	0.9407	PPARGC1A	Using functional genomics tool, the following SNPs were found to have functional significance: PPARGC1A rs6821591, rs12650562, rs12374310, rs4697425, rs13113110, and rs4452416; PPARGC1B rs251466 and rs17110586; and PPRC1 rs17114388 (all P鈥?鈥?.001).	10891	PPARGC1A	peroxisome proliferator-activated receptor gamma, coactivator 1 alpha	LEM6|PGC-1(alpha)|PGC-1v|PGC1|PGC1A|PPARGC1	OTTHUMP00000123372|PPAR gamma coactivator variant form|PPAR gamma coactivator-1|ligand effect modulator-6|peroxisome proliferative activated receptor, gamma, coactivator 1, alpha	PGC-related gene variants and elite endurance athletic status in a Chinese cohort: a functional study.	This study aims to examine the association between proliferator-activated receptor 纬 (PGC)-gene family-related single nucleotide polymorphisms (SNPs) and elite endurance runners' status in a Chinese cohort, and to gain insights into the functionality of a subset of SNPs. Genotype distributions of 133 SNPs in PPARGC1A, PPARGC1B, PPRC1, TFAM, TFB1M, TFB2M, NRF1, GABPA, GABPB1, ERR伪, and SIRT1 genes…	Scand J Med Sci Sports	2015	rs4452416	PPARGC1A	rs4452416	PPARGC1A	rs4452416	---	strength training
25170593_ABSTRACT_6	25170593	32	40	9606	10891	0.9407	PPARGC1A	The lowest P-value was found in PPARGC1A rs4697425 (P鈥?鈥?.001 for the comparison of allele frequencies between elite female endurance runners and their gender-matched controls).	10891	PPARGC1A	peroxisome proliferator-activated receptor gamma, coactivator 1 alpha	LEM6|PGC-1(alpha)|PGC-1v|PGC1|PGC1A|PPARGC1	OTTHUMP00000123372|PPAR gamma coactivator variant form|PPAR gamma coactivator-1|ligand effect modulator-6|peroxisome proliferative activated receptor, gamma, coactivator 1, alpha	PGC-related gene variants and elite endurance athletic status in a Chinese cohort: a functional study.	This study aims to examine the association between proliferator-activated receptor 纬 (PGC)-gene family-related single nucleotide polymorphisms (SNPs) and elite endurance runners' status in a Chinese cohort, and to gain insights into the functionality of a subset of SNPs. Genotype distributions of 133 SNPs in PPARGC1A, PPARGC1B, PPRC1, TFAM, TFB1M, TFB2M, NRF1, GABPA, GABPB1, ERR伪, and SIRT1 genes…	Scand J Med Sci Sports	2015	rs4697425	PPARGC1A	rs4697425	PPARGC1A	rs4697425	---	strength training
25170593_ABSTRACT_8	25170593	95	103	9606	10891	0.9407	PPARGC1A	Using functional genomics tool, the following SNPs were found to have functional significance: PPARGC1A rs6821591, rs12650562, rs12374310, rs4697425, rs13113110, and rs4452416; PPARGC1B rs251466 and rs17110586; and PPRC1 rs17114388 (all P鈥?鈥?.001).	10891	PPARGC1A	peroxisome proliferator-activated receptor gamma, coactivator 1 alpha	LEM6|PGC-1(alpha)|PGC-1v|PGC1|PGC1A|PPARGC1	OTTHUMP00000123372|PPAR gamma coactivator variant form|PPAR gamma coactivator-1|ligand effect modulator-6|peroxisome proliferative activated receptor, gamma, coactivator 1, alpha	PGC-related gene variants and elite endurance athletic status in a Chinese cohort: a functional study.	This study aims to examine the association between proliferator-activated receptor 纬 (PGC)-gene family-related single nucleotide polymorphisms (SNPs) and elite endurance runners' status in a Chinese cohort, and to gain insights into the functionality of a subset of SNPs. Genotype distributions of 133 SNPs in PPARGC1A, PPARGC1B, PPRC1, TFAM, TFB1M, TFB2M, NRF1, GABPA, GABPB1, ERR伪, and SIRT1 genes…	Scand J Med Sci Sports	2015	rs6821591	PPARGC1A	rs6821591	PPARGC1A	rs6821591	---	strength training
25188268_TITLE_1	25188268	7	13	9606	1289	0.9407	COL5A1	Is the COL5A1 rs12722 gene polymorphism associated with running economy?	1289	COL5A1	collagen, type V, alpha 1	-	OTTHUMP00000022513|OTTHUMP00000064637|alpha 1 type V collagen	Is the COL5A1 rs12722 gene polymorphism associated with running economy?	The COL5A1 rs12722 polymorphism is considered to be a novel genetic marker for endurance running performance. It has been postulated that COL5A1 rs12722 may influence the elasticity of tendons and the energetic cost of running. To date, there are no experimental data in the literature supporting the relationship between range of motion, running economy, and the COL5A1 rs12722 gene polymorphism. T…	PLoS ONE	2014	rs12722	COL5A1	rs12722	COL5A1	rs12722	---	strength training
25464125_ABSTRACT_12	25464125	51	56	9606	8600	0.5704	RANKL	The association of rs3018362 (RANK) and rs1021188 (RANKL) with stress fracture injury susceptibility supports their role in the maintenance of bone health and offers potential targets for therapeutic interventions.	8600	TNFSF11	tumor necrosis factor (ligand) superfamily, member 11	CD254|ODF|OPGL|OPTB2|RANKL|TRANCE|hRANKL2|sOdf	OTTHUMP00000178585|TNF-related activation-induced cytokine|osteoclast differentiation factor|osteoprotegerin ligand|receptor activator of nuclear factor kappa B ligand|tumor necrosis factor ligand superfamily, member 11	RANK/RANKL/OPG pathway: genetic associations with stress fracture period prevalence in elite athletes.	The RANK/RANKL/OPG signalling pathway is important in the regulation of bone turnover, with single nucleotide polymorphisms (SNPs) in genes within this pathway associated with bone phenotypic adaptations. To determine whether four SNPs associated with genes in the RANK/RANKL/OPG signalling pathway were associated with stress fracture injury in elite athletes. Radiologically confirmed stress fract…	Bone	2015	rs1021188	TNFSF11	rs1021188	TNFSF11	rs1021188	---	inflammation
25464125_ABSTRACT_7	25464125	37	42	9606	8600	0.5704	RANK	SNPs rs3018362 (RANK) and rs1021188 (RANKL) were associated with stress fracture injury (P<0.05). 8.1% of the stress fracture group and 2.8% of the non-stress fracture group were homozygote for the rare allele of rs1021188.	8792	TNFRSF11A	tumor necrosis factor receptor superfamily, member 11a, NFKB activator	CD265|FEO|LOH18CR1|ODFR|OFE|OPTB7|OSTS|PDB2|RANK|TRANCER	loss of heterozygosity, 18, chromosomal region 1|osteoclast differentiation factor receptor|receptor activator of nuclear factor-kappa B|tumor necrosis factor receptor superfamily, member 11a|tumor necrosis factor receptor superfamily, member 11a, activator of NFKB	RANK/RANKL/OPG pathway: genetic associations with stress fracture period prevalence in elite athletes.	The RANK/RANKL/OPG signalling pathway is important in the regulation of bone turnover, with single nucleotide polymorphisms (SNPs) in genes within this pathway associated with bone phenotypic adaptations. To determine whether four SNPs associated with genes in the RANK/RANKL/OPG signalling pathway were associated with stress fracture injury in elite athletes. Radiologically confirmed stress fract…	Bone	2015	rs3018362	TNFRSF11A	rs3018362	TNFRSF11A	rs3018362	---	inflammation
25464125_ABSTRACT_10	25464125	162	165	9606	690	0.5704	OPG	In cases of multiple stress fractures, homozygotes for the rare allele of rs1021188 and individuals possessing at least one copy of the rare allele of rs4355801 (OPG) were shown to be associated with stress fracture injury (P<0.05).	690	BTF3L1	basic transcription factor 3, like 1 pseudogene	HUMBTFB|OCIF|OPG|TNFRSF11B	-	RANK/RANKL/OPG pathway: genetic associations with stress fracture period prevalence in elite athletes.	The RANK/RANKL/OPG signalling pathway is important in the regulation of bone turnover, with single nucleotide polymorphisms (SNPs) in genes within this pathway associated with bone phenotypic adaptations. To determine whether four SNPs associated with genes in the RANK/RANKL/OPG signalling pathway were associated with stress fracture injury in elite athletes. Radiologically confirmed stress fract…	Bone	2015	rs4355801	BTF3L1	rs4355801	BTF3L1	rs4355801	---	inflammation
25495276_ABSTRACT_2	25495276	130	141	9606	358	1	aquaporin 1	The objective of this study was to test the association of the rs1049305 (G > C) variant within the 3'-untranslated region of the aquaporin 1 gene, AQP1, with changes in body weight, post-race serum sodium concentration and performance in Ironman triathletes.	358	AQP1	aquaporin 1 (Colton blood group)	AQP-CHIP|CHIP28|CO|MGC26324	Colton blood group|aquaporin 1|aquaporin 1 (channel-forming integral protein, 28kDa, CO blood group)|channel-like integral membrane protein, 28-kDa	A variant within the AQP1 3'-untranslated region is associated with running performance, but not weight changes, during an Ironman Triathlon.	The objective of this study was to test the association of the rs1049305 (G > C) variant within the 3'-untranslated region of the aquaporin 1 gene, AQP1, with changes in body weight, post-race serum sodium concentration and performance in Ironman triathletes. Five hundred and four male Ironman triathletes were genotyped for the rs1049305 variant within the AQP1 gene. Change in pre- and post-race …	J Sports Sci	2015	rs1049305	AQP1	rs1049305	AQP1	rs1049305	---	aerobic exercise
25612568_ABSTRACT_4	25612568	215	220	9606	4524	0.9407	MTHFR	We compared the genotype distribution of five genetic Single Nucleotide Polymorphisms (SNPs) known to be associated with obesity and obesity co-morbidities (IGF2BP2 rs4402960, LPL rs320, LPL rs328, KCJN rs5219, and MTHFR rs1801133) between athletes (all male, n鈥?鈥?61; endurance athletes n鈥?鈥?54, sprint/power athletes n鈥?鈥?07), and controls (all male, n鈥?鈥?44) in Polish and Russian samples.	4524	MTHFR	5,10-methylenetetrahydrofolate reductase (NADPH)	-	OTTHUMP00000002367|OTTHUMP00000002368|methylenetetrahydrofolate reductase intermediate form	Elite athletes' genetic predisposition for altered risk of complex metabolic traits.	Genetic variants may predispose humans to elevated risk of common metabolic morbidities such as obesity and Type 2 Diabetes (T2D). Some of these variants have also been shown to influence elite athletic performance and the response to exercise training. We compared the genotype distribution of five genetic Single Nucleotide Polymorphisms (SNPs) known to be associated with obesity and obesity co-m…	BMC Genomics	2015	rs1801133	MTHFR	rs1801133	MTHFR	rs1801133	rs1801133	CRP-levels
25612568_ABSTRACT_8	25612568	0	7	9606	10644	0.9407	LPL	IGF2BP2 rs4402960 and LPL rs320 were significantly associated with athletic status; sprint/power athletes were twice more likely to have the IGF2BP2 rs4402960 risk (T) allele compared to endurance athletes (OR鈥?鈥?.11, 95% CI = 1.03-4.30, P <0.041), and non-athletic controls were significantly less likely to have the T allele compared to sprint/power athletes (OR = 0.62, 95% CI =0.43-0.89, P <0.00…	4023	LPL	lipoprotein lipase	HDLCQ11|LIPD	-	Elite athletes' genetic predisposition for altered risk of complex metabolic traits.	Genetic variants may predispose humans to elevated risk of common metabolic morbidities such as obesity and Type 2 Diabetes (T2D). Some of these variants have also been shown to influence elite athletic performance and the response to exercise training. We compared the genotype distribution of five genetic Single Nucleotide Polymorphisms (SNPs) known to be associated with obesity and obesity co-m…	BMC Genomics	2015	rs320	LPL	rs320	LPL	rs320	---	strength training
25612568_ABSTRACT_4	25612568	157	164	9606	10644	0.9407	LPL	We compared the genotype distribution of five genetic Single Nucleotide Polymorphisms (SNPs) known to be associated with obesity and obesity co-morbidities (IGF2BP2 rs4402960, LPL rs320, LPL rs328, KCJN rs5219, and MTHFR rs1801133) between athletes (all male, n鈥?鈥?61; endurance athletes n鈥?鈥?54, sprint/power athletes n鈥?鈥?07), and controls (all male, n鈥?鈥?44) in Polish and Russian samples.	4023	LPL	lipoprotein lipase	HDLCQ11|LIPD	-	Elite athletes' genetic predisposition for altered risk of complex metabolic traits.	Genetic variants may predispose humans to elevated risk of common metabolic morbidities such as obesity and Type 2 Diabetes (T2D). Some of these variants have also been shown to influence elite athletic performance and the response to exercise training. We compared the genotype distribution of five genetic Single Nucleotide Polymorphisms (SNPs) known to be associated with obesity and obesity co-m…	BMC Genomics	2015	rs328	LPL	rs328	LPL	rs328	---	strength training
25612568_ABSTRACT_4	25612568	157	164	9606	10644	0.9407	IGF2BP2	We compared the genotype distribution of five genetic Single Nucleotide Polymorphisms (SNPs) known to be associated with obesity and obesity co-morbidities (IGF2BP2 rs4402960, LPL rs320, LPL rs328, KCJN rs5219, and MTHFR rs1801133) between athletes (all male, n鈥?鈥?61; endurance athletes n鈥?鈥?54, sprint/power athletes n鈥?鈥?07), and controls (all male, n鈥?鈥?44) in Polish and Russian samples.	10644	IGF2BP2	insulin-like growth factor 2 mRNA binding protein 2	IMP-2|IMP2|VICKZ2|p62	IGF II mRNA binding protein 2|IGF-II mRNA-binding protein 2|insulin-like 2 growth factor 2-binding protein 2	Elite athletes' genetic predisposition for altered risk of complex metabolic traits.	Genetic variants may predispose humans to elevated risk of common metabolic morbidities such as obesity and Type 2 Diabetes (T2D). Some of these variants have also been shown to influence elite athletic performance and the response to exercise training. We compared the genotype distribution of five genetic Single Nucleotide Polymorphisms (SNPs) known to be associated with obesity and obesity co-m…	BMC Genomics	2015	rs4402960	IGF2BP2	rs4402960	IGF2BP2	rs4402960	---	strength training
25612568_ABSTRACT_8	25612568	141	148	9606	10644	0.9407	KCJN	We compared the genotype distribution of five genetic Single Nucleotide Polymorphisms (SNPs) known to be associated with obesity and obesity co-morbidities (IGF2BP2 rs4402960, LPL rs320, LPL rs328, KCJN rs5219, and MTHFR rs1801133) between athletes (all male, n鈥?鈥?61; endurance athletes n鈥?鈥?54, sprint/power athletes n鈥?鈥?07), and controls (all male, n鈥?鈥?44) in Polish and Russian samples.	3767	KCNJ11	potassium inwardly-rectifying channel, subfamily J, member 11	BIR|HHF2|IKATP|KIR6.2|MGC133230|PHHI|TNDM3	ATP-sensitive inward rectifier potassium channel 11|beta-cell inward rectifier subunit|inwardly rectifying potassium channel KIR6.2|potassium inwardly-rectifying channel J11	Elite athletes' genetic predisposition for altered risk of complex metabolic traits.	Genetic variants may predispose humans to elevated risk of common metabolic morbidities such as obesity and Type 2 Diabetes (T2D). Some of these variants have also been shown to influence elite athletic performance and the response to exercise training. We compared the genotype distribution of five genetic Single Nucleotide Polymorphisms (SNPs) known to be associated with obesity and obesity co-m…	BMC Genomics	2015	rs5219	KCNJ11	rs5219	KCNJ11	rs5219	---	strength training
25729143_ABSTRACT_6	25729143	61	65	9606	4774	1	NFIA	Next, case-control studies resulted in remaining three SNPs (NFIA-AS2 rs1572312, TSHR rs7144481, RBFOX1 rs7191721) associated with endurance athlete status.	4774	NFIA	nuclear factor I/A	DKFZp434L0422|KIAA1439|NFI-L	OTTHUMP00000010292	Genome-wide association study identifies three novel genetic markers associated with elite endurance performance.	To investigate the association between multiple single-nucleotide polymorphisms (SNPs), aerobic performance and elite endurance athlete status in Russians. By using GWAS approach, we examined the association between 1,140,419 SNPs and relative maximal oxygen consumption rate ([Formula: see text]O2max) in 80 international-level Russian endurance athletes (46 males and 34 females). To validate obta…	Biol Sport	2015	rs1572312	NFIA	rs1572312	NFIA	rs1572312	---	aerobic exercise
25729143_ABSTRACT_6	25729143	81	85	9606	7253	0.9407	TSHR	Next, case-control studies resulted in remaining three SNPs (NFIA-AS2 rs1572312, TSHR rs7144481, RBFOX1 rs7191721) associated with endurance athlete status.	7253	TSHR	thyroid stimulating hormone receptor	CHNG1|LGR3|MGC75129|hTSHR-I	seven transmembrane helix receptor|thyroid stimulating hormone receptor, isoform 2|thyrotropin receptor|thyrotropin receptor-I, hTSHR-I	Genome-wide association study identifies three novel genetic markers associated with elite endurance performance.	To investigate the association between multiple single-nucleotide polymorphisms (SNPs), aerobic performance and elite endurance athlete status in Russians. By using GWAS approach, we examined the association between 1,140,419 SNPs and relative maximal oxygen consumption rate ([Formula: see text]O2max) in 80 international-level Russian endurance athletes (46 males and 34 females). To validate obta…	Biol Sport	2015	rs7144481	TSHR	rs7144481	TSHR	rs7144481	---	aerobic exercise
25894531_ABSTRACT_2	25894531	169	175	9606	6337	0.9407	SCNN1A	To determine the effects of single nucleotide polymorphisms (SNPs) in the adrenergic 尾2-receptor gene (ADRB2, rs1042713, and rs1042714) and epithelial Na channel gene (SCNN1A, rs2228576) on cycling performance after the inhalation of salbutamol.	6337	SCNN1A	sodium channel, nonvoltage-gated 1 alpha	ENaCa|ENaCalpha|FLJ21883|SCNEA|SCNN1	alpha ENaC-2|amiloride-sensitive epithelial sodium channel alpha subunit|nasal epithelial sodium channel alpha subunit	Pharmacogenetic Effects of Inhaled Salbutamol on 10-km Time Trial Performance in Competitive Male and Female Cyclists.	To determine the effects of single nucleotide polymorphisms (SNPs) in the adrenergic 尾2-receptor gene (ADRB2, rs1042713, and rs1042714) and epithelial Na channel gene (SCNN1A, rs2228576) on cycling performance after the inhalation of salbutamol. Randomized double-blind, mixed-model repeated measures. University Research Setting. Sixty-nine trained (maximal oxygen consumption: 62.3 卤 7.6 mL路kg路min…	Clin J Sport Med	2016	rs2228576	SCNN1A	rs2228576	SCNN1A	rs2228576	---	strength training
26062916_ABSTRACT_7	26062916	114	120	9606	1544	0.9407	CYP1A2	Subjects were genotyped and classified as AA homozygotes or AC heterozygotes for the rs762551 polymorphism of the CYP1A2 gene involved in caffeine metabolism.	1544	CYP1A2	cytochrome P450, family 1, subfamily A, polypeptide 2	CP12|P3-450|P450(PA)	P450 form 4|aryl hydrocarbon hydroxylase|cytochrome P450, subfamily I (aromatic compound-inducible), polypeptide 2|dioxin-inducible P3-450|flavoprotein-linked monooxygenase|microsomal monooxygenase|xenobiotic monooxygenase	Caffeine and 3-km cycling performance: Effects of mouth rinsing, genotype, and time of day.	We assessed the efficacy of caffeine mouth rinsing on 3-km cycling performance and determined whether caffeine mouth rinsing affects performance gains influenced by the CYP1A2 polymorphism. Thirty-eight recreational cyclists completed four simulated 3-km time trials (TT). Subjects ingested either 6鈥塵g/kg BW of caffeine or placebo 1鈥塰 prior to each TT. Additionally, 25鈥塵L of 1.14% caffeine or plac…	Scand J Med Sci Sports	2016	rs762551	CYP1A2	rs762551	CYP1A2	rs762551	---	strength training
26231489_ABSTRACT_6	26231489	369	376	9606	114805	0.9407	GALNT13	Notably, 11 (9%) of these genetic markers (endurance markers: ACE I, ACTN3 577X, PPARA rs4253778 G, PPARGC1A Gly482; power/strength markers: ACE D, ACTN3 Arg577, AMPD1 Gln12, HIF1A 582Ser, MTHFR rs1801131 C, NOS3 rs2070744 T, PPARG 12Ala) have shown positive associations with athlete status in three or more studies, and six markers (CREM rs1531550 A, DMD rs939787 T, GALNT13 rs10196189 G, NFIA-AS1…	114805	GALNT13	UDP-N-acetyl-alpha-D-galactosamine:polypeptide N-acetylgalactosaminyltransferase 13 (GalNAc-T13)	FLJ16031|FLJ41157|GalNAc-T13|H_NH0187G20.1|KIAA1918|MGC119459|MGC119461|WUGSC:H_NH0187G20.1	GalNAc transferase 13|OTTHUMP00000162746|UDP-N-acetyl-alpha-D-galactosamine:polypeptide N-acetylgalactosaminyltransferase 13	Current Progress in Sports Genomics.	Understanding the genetic architecture of athletic performance is an important step in the development of methods for talent identification in sport. Research concerned with molecular predictors has highlighted a number of potentially important DNA polymorphisms contributing to predisposition to success in certain types of sport. This review summarizes the evidence and mechanistic insights on the…	Adv Clin Chem	2015	rs10196189	GALNT13	rs10196189	GALNT13	rs10196189	---	strength training
26231489_ABSTRACT_6	26231489	369	376	9606	114805	0.9407	CREM	Notably, 11 (9%) of these genetic markers (endurance markers: ACE I, ACTN3 577X, PPARA rs4253778 G, PPARGC1A Gly482; power/strength markers: ACE D, ACTN3 Arg577, AMPD1 Gln12, HIF1A 582Ser, MTHFR rs1801131 C, NOS3 rs2070744 T, PPARG 12Ala) have shown positive associations with athlete status in three or more studies, and six markers (CREM rs1531550 A, DMD rs939787 T, GALNT13 rs10196189 G, NFIA-AS1…	1390	CREM	cAMP responsive element modulator	ICER|MGC111110|MGC17881|MGC41893|hCREM-2	OTTHUMP00000019442|OTTHUMP00000019443|OTTHUMP00000019444|OTTHUMP00000019446|OTTHUMP00000019448|cAMP response element modulator|hCREM 2alpha-b protein|hCREM 2beta-a protein|inducible cAMP early repressor ICER	Current Progress in Sports Genomics.	Understanding the genetic architecture of athletic performance is an important step in the development of methods for talent identification in sport. Research concerned with molecular predictors has highlighted a number of potentially important DNA polymorphisms contributing to predisposition to success in certain types of sport. This review summarizes the evidence and mechanistic insights on the…	Adv Clin Chem	2015	rs1531550	CREM	rs1531550	CREM	rs1531550	---	strength training
26231489_ABSTRACT_6	26231489	369	376	9606	114805	0.9407	DMD	Notably, 11 (9%) of these genetic markers (endurance markers: ACE I, ACTN3 577X, PPARA rs4253778 G, PPARGC1A Gly482; power/strength markers: ACE D, ACTN3 Arg577, AMPD1 Gln12, HIF1A 582Ser, MTHFR rs1801131 C, NOS3 rs2070744 T, PPARG 12Ala) have shown positive associations with athlete status in three or more studies, and six markers (CREM rs1531550 A, DMD rs939787 T, GALNT13 rs10196189 G, NFIA-AS1…	1756	DMD	dystrophin	BMD|CMD3B|DXS142|DXS164|DXS206|DXS230|DXS239|DXS268|DXS269|DXS270|DXS272	Duchenne muscular dystrophy protein|OTTHUMP00000023117|OTTHUMP00000023124|OTTHUMP00000023125|OTTHUMP00000023126|muscular dystrophy, Duchenne and Becker types	Current Progress in Sports Genomics.	Understanding the genetic architecture of athletic performance is an important step in the development of methods for talent identification in sport. Research concerned with molecular predictors has highlighted a number of potentially important DNA polymorphisms contributing to predisposition to success in certain types of sport. This review summarizes the evidence and mechanistic insights on the…	Adv Clin Chem	2015	rs939787	DMD	rs939787	DMD	rs939787	---	strength training
26677828_ABSTRACT_10	26677828	100	104	9606	3481	1	IGF2	Genotyping by polymerase chain reaction-restriction fragment length polymorphism was used to detect IGF2 (rs680) and 伪-actinin-3 (ACTN3) (rs1815739) gene polymorphisms.	3481	IGF2	insulin-like growth factor 2 (somatomedin A)	C11orf43|FLJ22066|FLJ44734|INSIGF|pp9974	OTTHUMP00000011012|OTTHUMP00000011015|OTTHUMP00000011018|OTTHUMP00000011157|insulin-like growth factor 2|insulin-like growth factor II|insulin-like growth factor type 2|putative insulin-like growth factor II associated protein|somatomedin A	G Allele of the IGF2 ApaI Polymorphism Is Associated With Judo Status.	Itaka, T, Agemizu, K, Aruga, S, and Machida, S. G allele of the IGF2 ApaI polymorphism is associated with judo status. J Strength Cond Res 30(7): 2043-2048, 2016-Previous studies have reported that the insulin-like growth factor 2 (IGF2) ApaI polymorphism is associated with body mass index, fat mass, and grip strength. Competitive judo requires high levels of strength and power. The purpose of th…	J Strength Cond Res	2016	rs680	IGF2	rs680	IGF2	rs680	---	strength training
26837930_ABSTRACT_2	26837930	97	138	9606	1271	1	ciliary neurotrophic factor receptor gene	The aim of this study was to investigate whether rs41274853 in the 3'-untranslated region of the ciliary neurotrophic factor receptor gene (CNTFR) is associated with elite sprint/power athletic status and assess its functional significance.	1271	CNTFR	ciliary neurotrophic factor receptor	MGC1774	CNTFR alpha|OTTHUMP00000021270|OTTHUMP00000021271|ciliary neurotrophic factor receptor alpha	CNTFR Genotype and Sprint/power Performance: Case-control Association and Functional Studies.	The aim of this study was to investigate whether rs41274853 in the 3'-untranslated region of the ciliary neurotrophic factor receptor gene (CNTFR) is associated with elite sprint/power athletic status and assess its functional significance. A total of 211 Japanese sprint/power track and field athletes (62 international, 72 national, and 77 regional athletes) and 814 Japanese controls were genotyp…	Int J Sports Med	2016	rs41274853	CNTFR	rs41274853	CNTFR	rs41274853	---	strength training
27928199_ABSTRACT_6	27928199	87	91	9606	6869	0.5704	ACE	We identified significant associations for five polymorphisms (5HTT 5-HTTLPR, ACE I/D, NK1R rs6715729, 5HT1AR -1019C>G and CRF-BP CRF-BPs11) with athletic performance.	1636	ACE	angiotensin I converting enzyme (peptidyl-dipeptidase A) 1	ACE1|CD143|DCP|DCP1|MGC26566	CD143 antigen|angiotensin I converting enzyme|angiotensin converting enzyme, somatic isoform|carboxycathepsin|dipeptidyl carboxypeptidase 1|kininase II|peptidase P|peptidyl-dipeptidase A|testicular ECA	Association of Anxiety-Related Polymorphisms with Sports Performance in Chilean Long Distance Triathletes: A Pilot Study.	Different factors affecting athletic performance are well established: intensity and type of training, anthropometric characteristics as well as an important psychological component. However, the contribution of the genetic background has been less investigated. The aim of the present study was to investigate the influence of polymorphisms within genes associated with stress and anxiety (5HTT, CR…	J Sports Sci Med	2016	rs4340	ACE	rs4340	ACE	rs4340	---	aerobic exercise
27928199_ABSTRACT_6	27928199	87	91	9606	6869	0.5704	NK1R	We identified significant associations for five polymorphisms (5HTT 5-HTTLPR, ACE I/D, NK1R rs6715729, 5HT1AR -1019C>G and CRF-BP CRF-BPs11) with athletic performance.	6869	TACR1	tachykinin receptor 1	NK1R|NKIR|SPR|TAC1R	NK-1 receptor|neurokinin 1 receptor|tachykinin 1 receptor (substance P receptor, neurokinin 1 receptor)|tachykinin receptor 1 (substance P receptor; neurokinin-1 receptor)	Association of Anxiety-Related Polymorphisms with Sports Performance in Chilean Long Distance Triathletes: A Pilot Study.	Different factors affecting athletic performance are well established: intensity and type of training, anthropometric characteristics as well as an important psychological component. However, the contribution of the genetic background has been less investigated. The aim of the present study was to investigate the influence of polymorphisms within genes associated with stress and anxiety (5HTT, CR…	J Sports Sci Med	2016	rs6715729	TACR1	rs6715729	TACR1	rs6715729	---	aerobic exercise
28103813_ABSTRACT_3	28103813	120	123	9606	79068	0.9407	FTO	In 1089 participants, comprising 530 elite rugby athletes and 559 non-athletes, DNA was collected and genotyped for the FTO rs9939609 variant using real-time PCR.	79068	FTO	fat mass and obesity associated	KIAA1752|MGC5149	-	Fat mass and obesity associated (FTO) gene influences skeletal muscle phenotypes in non-resistance trained males and elite rugby playing position.	FTO gene variants have been associated with obesity phenotypes in sedentary and obese populations, but rarely with skeletal muscle and elite athlete phenotypes. In 1089 participants, comprising 530 elite rugby athletes and 559 non-athletes, DNA was collected and genotyped for the FTO rs9939609 variant using real-time PCR. In a subgroup of non-resistance trained individuals (NT; n鈥?鈥?20), we also …	BMC Genet.	2017	rs9939609	FTO	rs9939609	FTO	rs9939609	---	aerobic exercise
28184307_TITLE_1	28184307	51	69	9606	7421	1	vitamin D receptor	Low back pain and FokI (rs2228570) polymorphism of vitamin D receptor in athletes.	7421	VDR	vitamin D (1,25- dihydroxyvitamin D3) receptor	NR1I1	vitamin D (1,25-dihydroxyvitamin D3) receptor	Low back pain and FokI (rs2228570) polymorphism of vitamin D receptor in athletes.	Low back pain (LBP) is common in athletes. LBP can be detrimental to athletic performance and health. Factors predisposing to LBP in athletes remain elusive and require further studies. We investigated whether carriage of a specific genotype and/or allele of vitamin D receptor gene (VDR) FokI polymorphism (rs2228570) was a risk factor for LBP in athletes of different sports disciplines. This geno…	BMC Sports Sci Med Rehabil	2017	rs2228570	VDR	rs2228570	VDR	rs2228570	---	aerobic exercise
#	#	#	#	#	#	#	#	#	#	#	#	#	#	#	#	#	#	#	APOE	rs7412	APOE	rs7412	rs7412	cardiopulmonary function
#	#	#	#	#	#	#	#	#	#	#	#	#	#	#	#	#	#	#	APOE	rs429358	APOE	rs429358	rs429358	cardiopulmonary function
#	#	#	#	#	#	#	#	#	#	#	#	#	#	#	#	#	#	#	TRHR	rs16892496	TRHR	rs16892496	rs16892496	strength training
#	#	#	#	#	#	#	#	#	#	#	#	#	#	#	#	#	#	#	ACVR1B	rs2854464	ACVR1B	rs2854464	rs2854464	strength training
#	#	#	#	#	#	#	#	#	#	#	#	#	#	#	#	#	#	#	VEGFR2	rs1870377	VEGFR2	rs1870377	rs1870377	aerobic exercise
#	#	#	#	#	#	#	#	#	#	#	#	#	#	#	#	#	#	#	HFE	rs1799945	HFE	rs1799945	rs1799945	aerobic exercise
#	#	#	#	#	#	#	#	#	#	#	#	#	#	#	#	#	#	#	HFE	rs1800562	HFE	rs1800562	rs1800562	aerobic exercise
#	#	#	#	#	#	#	#	#	#	#	#	#	#	#	#	#	#	#	NAT2	rs1208	NAT2	rs1208	rs1208	anaerobic exercise#inflammation
#	#	#	#	#	#	#	#	#	#	#	#	#	#	#	#	#	#	#	CALCA	rs3781719	CALCA	rs3781719	rs3781719	vascular smooth muscle contraction
#	#	#	#	#	#	#	#	#	#	#	#	#	#	#	#	#	#	#	IL6R	rs2228145	IL6R	rs2228145	rs2228145	inflammation
#	#	#	#	#	#	#	#	#	#	#	#	#	#	#	#	#	#	#	SOX17	rs6475606	SOX17	rs6475606	rs6475606	vascular smooth muscle contraction
#	#	#	#	#	#	#	#	#	#	#	#	#	#	#	#	#	#	#	ADD1	rs4961	ADD1	rs4961	rs4961	vascular smooth muscle contraction
#	#	#	#	#	#	#	#	#	#	#	#	#	#	#	#	#	#	#	ADRB2	rs1042714	ADRB2	rs1042714	rs1042714	aerobic exercise
#	#	#	#	#	#	#	#	#	#	#	#	#	#	#	#	#	#	#	STARD13	rs9315204	STARD13	rs9315204	rs9315204	vascular smooth muscle contraction
#	#	#	#	#	#	#	#	#	#	#	#	#	#	#	#	#	#	#	CRP	rs1205	CRP	rs1205	rs1205	inflammation
#	#	#	#	#	#	#	#	#	#	#	#	#	#	#	#	#	#	#	LGALS3	rs2274273	LGALS3	rs2274273	rs2274273	vascular smooth muscle contraction
#	#	#	#	#	#	#	#	#	#	#	#	#	#	#	#	#	#	#	AGTR1	rs5189	AGTR1	rs5189	rs5189	vascular smooth muscle contraction
